# Supplementary material for: Multi-variable, multi-configuration testing of ORCHIDEE land surface model water flux and storage estimates across semi-arid sites in the southwestern US
Source: Copernicus journal article supplement (doi:10.5194/hess-2019-598), 2019-12-04

Multi-variable, multi-configuration testing of ORCHIDEE land surface model water flux and storage estimates across semi-arid sites in the southwestern US

5 Natasha MacBean<sup>1\*</sup>, Russell L. Scott<sup>2</sup>, Joel A. Biederman<sup>2</sup>, Catherine Ottlé<sup>3</sup>, Nicolas Vuichard<sup>3</sup>, Agnès Ducharne<sup>4</sup>, Thomas Kolb<sup>5</sup>, Sabina Dore<sup>6</sup>, Marcy Litvak<sup>7</sup>, David J.P. Moores<sup>8</sup>.

<sup>1</sup>Department of Geography, Indiana University, Bloomington, IN 47405, USA.  
<sup>2</sup>Southwest Watershed Research Center, United States Agricultural Department, Agricultural Research Service, Tucson, AZ 85719, USA.  
10 <sup>3</sup>Laboratoire des Sciences du Climat et de l’Environnement, LSCE/IPSL, CEA-CNRS-UVSQ, Université Paris-Saclay, Gif-sur-Yvette, F-91191, France.  
<sup>4</sup>UMR METIS, Sorbonne Université, CNRS, EPHE, Paris, F-75005, France  
<sup>5</sup>School of Forestry, Northern Arizona University, Flagstaff, AZ, 86011, USA.  
<sup>6</sup>Hydrofocus, Inc., Davis, CA, 95618, USA.  
15 <sup>7</sup>Department of Biology, University of New Mexico, Albuquerque, NM, 87131, USA.  
<sup>8</sup>School of Natural Resources and the Environment, University of Arizona, Tucson, AZ, 85721, USA.

\*Correspondence to: Natasha MacBean (nlmacbean@gmail.com)

Table S1: Depths of the ORCHIDEE 11-layer discretized hydrology model

| ORCHIDEE Layer | Layer thickness (m) | Cumulative Depth (m) |
|----------------|---------------------|----------------------|
| 1              | 0.001               | 0.001                |
| 2              | 0.003               | 0.004                |
| 3              | 0.006               | 0.01                 |
| 4              | 0.012               | 0.022                |
| 5              | 0.023               | 0.045                |
| 6              | 0.047               | 0.092                |
| 7              | 0.092               | 0.186                |
| 8              | 0.188               | 0.374                |
| 9              | 0.375               | 0.750                |
| 10             | 0.750               | 1.5                  |
| 11             | 0.5                 | 2.0                  |

20

25

Figure S1: Complete daily time series comparing the 2LAY (green curve) and 11LAY (blue curve) simulations for the following hydrological variables: i) ET (top panel for each site) compared to observations (black curve); ii) surface runoff (2<sup>nd</sup> panel for each site); iii) drainage (3<sup>rd</sup> panel for each site); and iv) total 2m column volumetric water content (VWC) soil moisture (bottom panel for each site). Precipitation is shown in the grey bars in the bottom panel for each site. Sites in following order: a) US-Fuf; b) US-Vcp; c) US-SRM; d) US-Whs; e) US-SRG; f) US-Wkg. Precipitation is shown in the grey lines in the bottom panel for each site.

a) US-Fuf

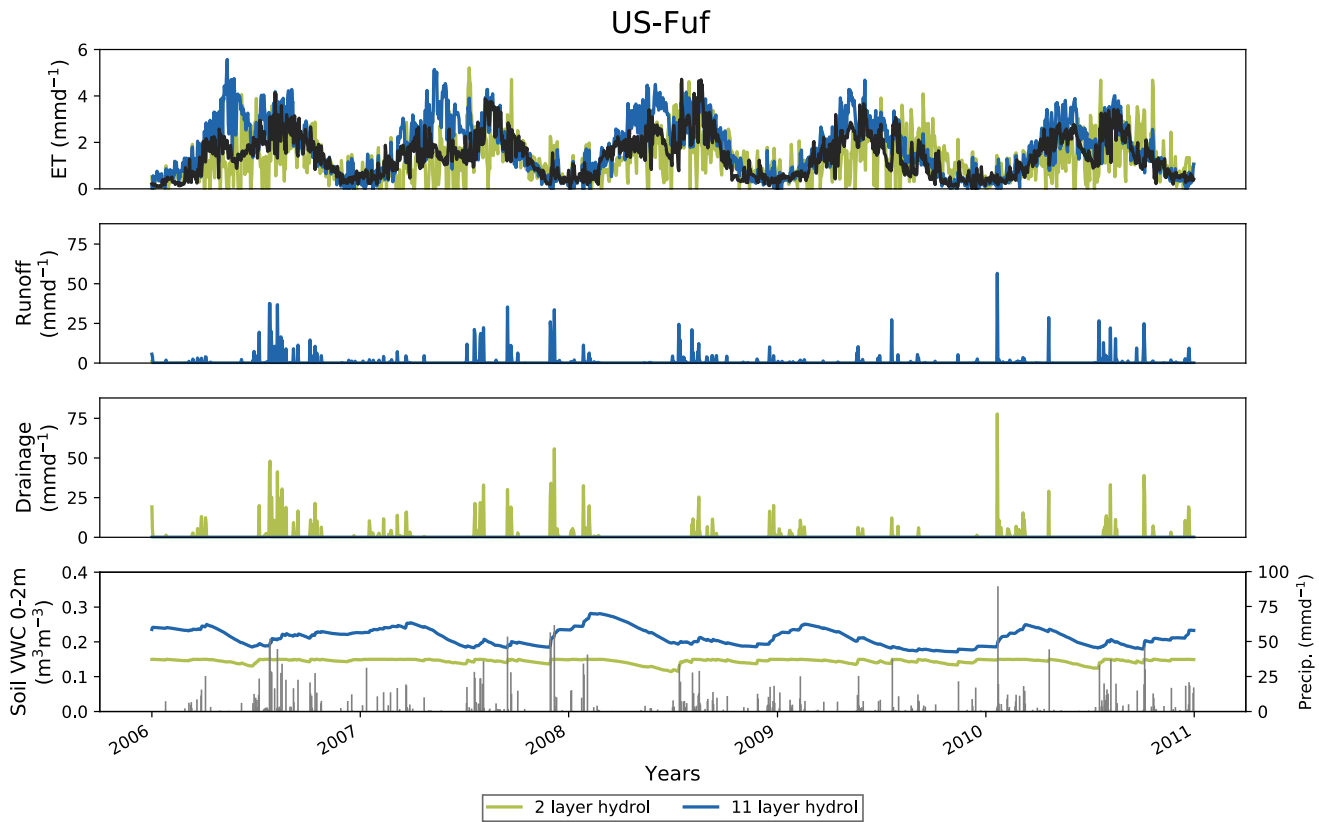

b) US-Vcp

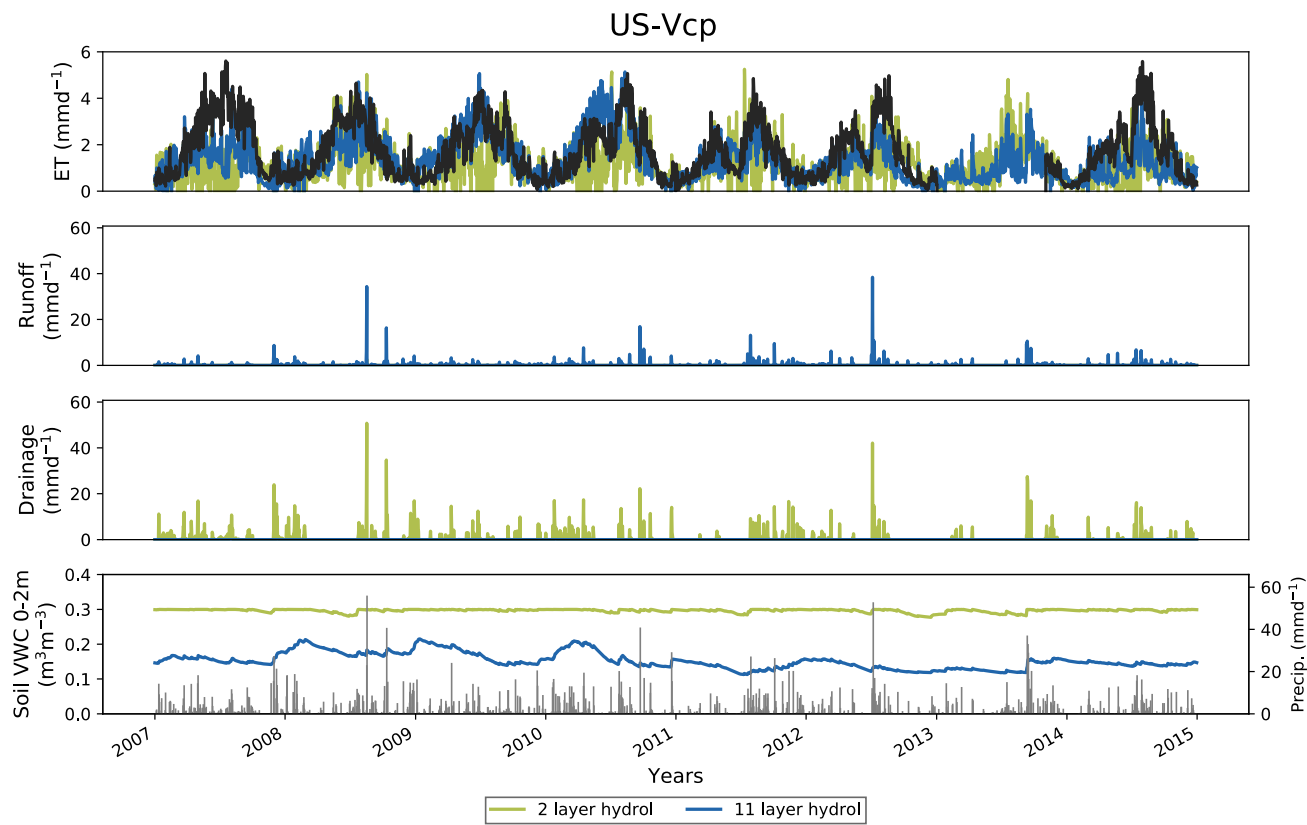

45

50

55

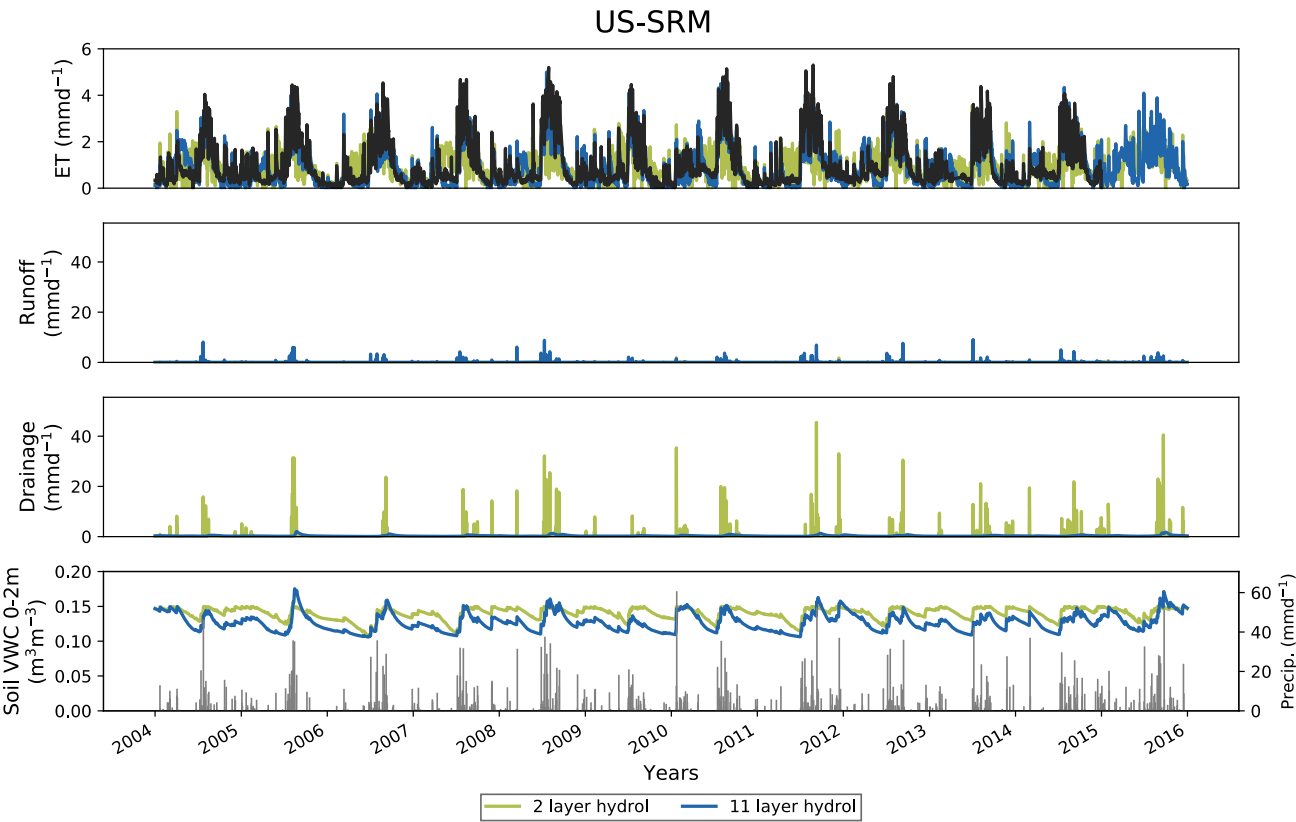

d) US-Whs

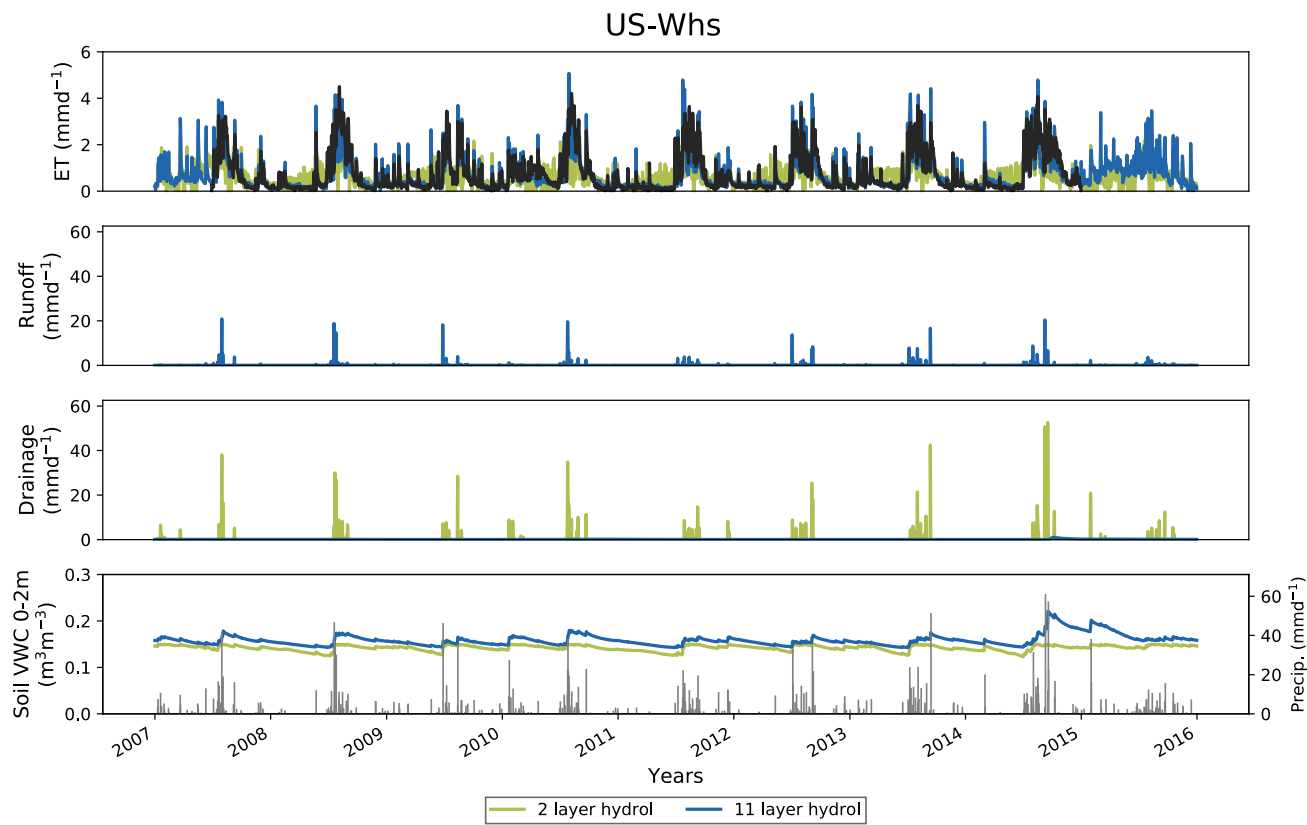

80

85

90

e) US-SRG

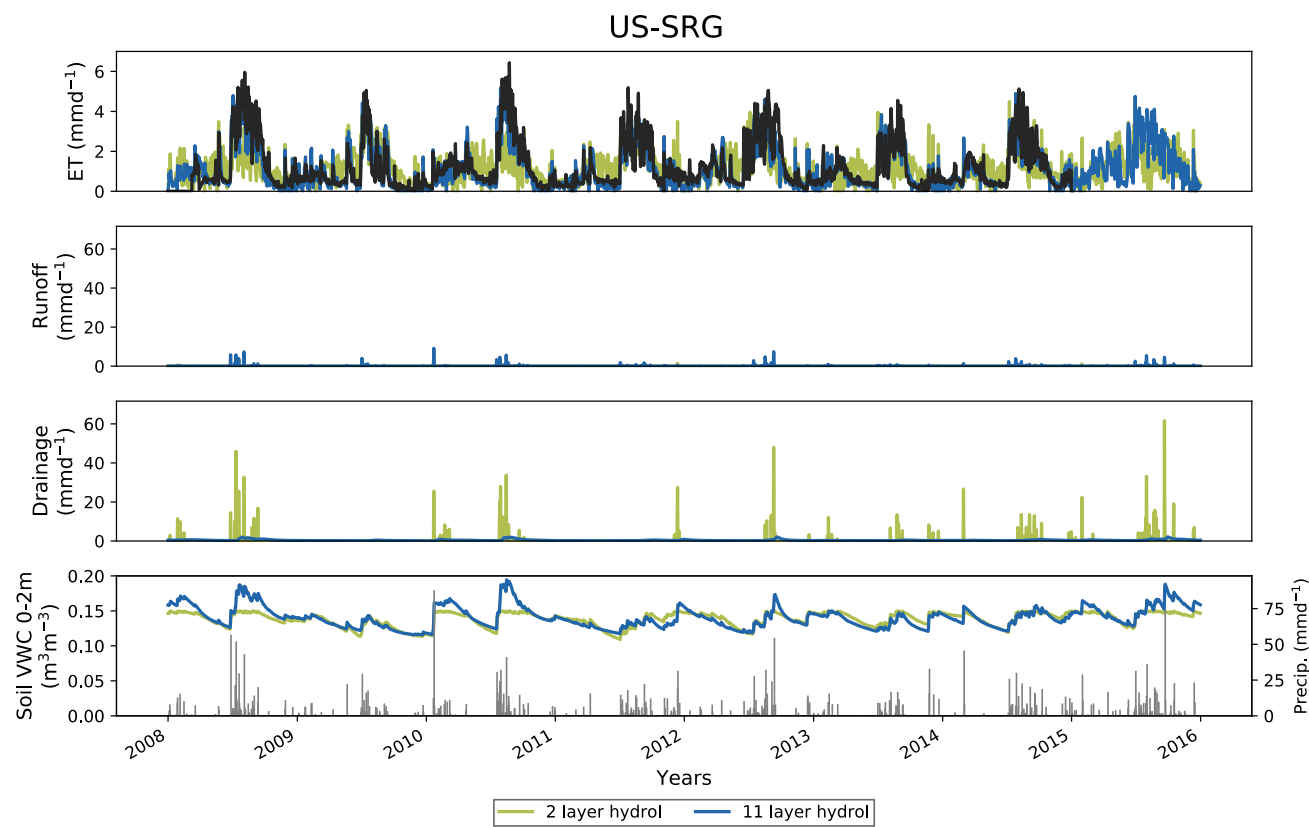

95

100

105

f) US-Wkg

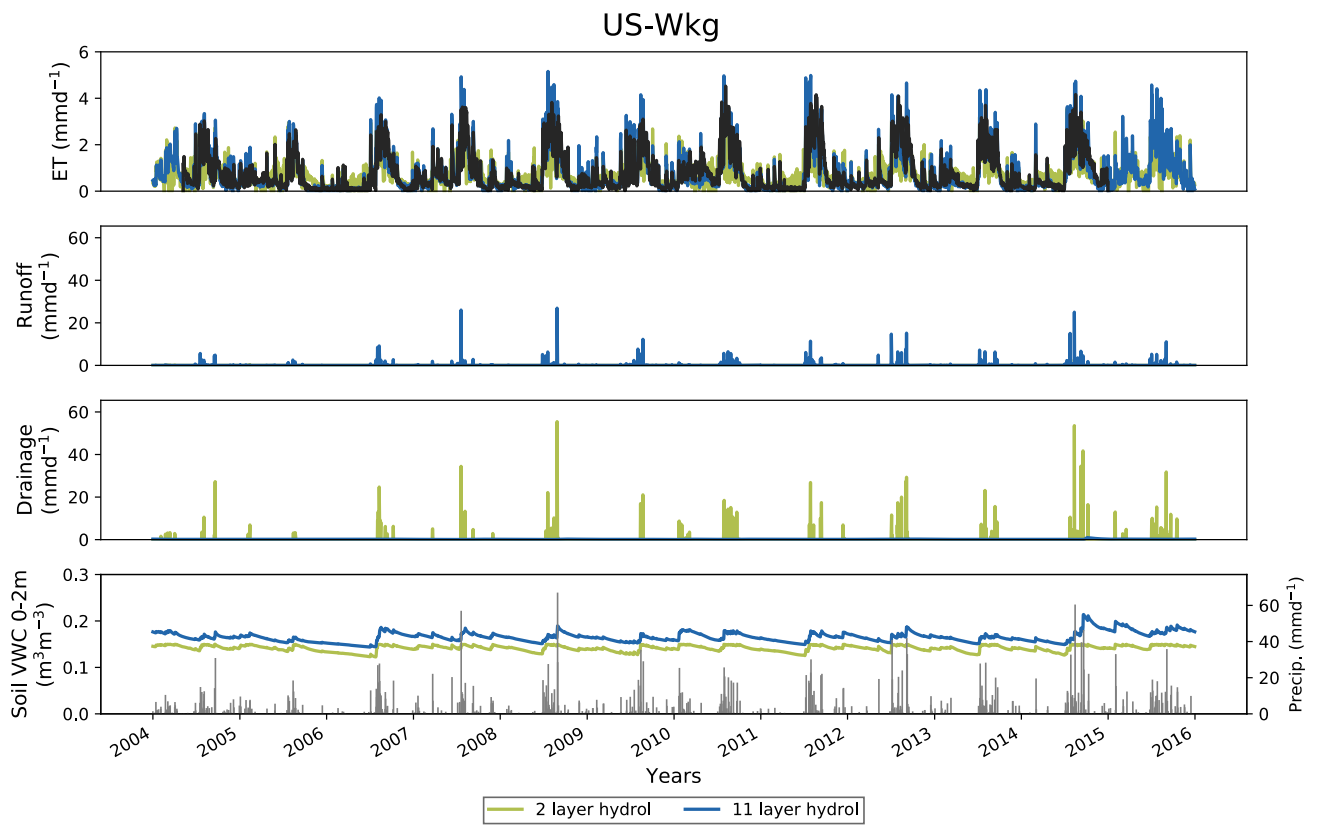

110

115

120

Figure S2: Complete daily time series of variables influencing changes in ET between the 2LAY (green curve) and 11LAY (blue curve) simulations at three sites: left column = high elevation tree-dominated site (US-Fuf); middle column = low elevation mesquite shrub-dominated site (US-SRM); right column = low elevation C4 grass site (US-SRG). At each site, top panel: LAI; 2<sup>nd</sup> panel: ET compared to observations (black curve); 3<sup>rd</sup> panel: transpiration; 4<sup>th</sup> panel: bare soil evaporation; 5<sup>th</sup> panel: empirical water limitation function ( $\beta$ ) that scales photosynthesis and stomatal conductance; bottom panel: soil moisture expressed as volumetric water content (VWC) in the uppermost 10cm of the soil. Precipitation is shown in the grey bars in the bottom panel for each site. Sites in following order: a) US-Fuf; b) US-Vcp; c) US-SRM; d) US-Whs; e) US-SRG; f) US-Wkg. Precipitation is shown in the grey lines in the bottom panel for each site.

a) US-Fuf

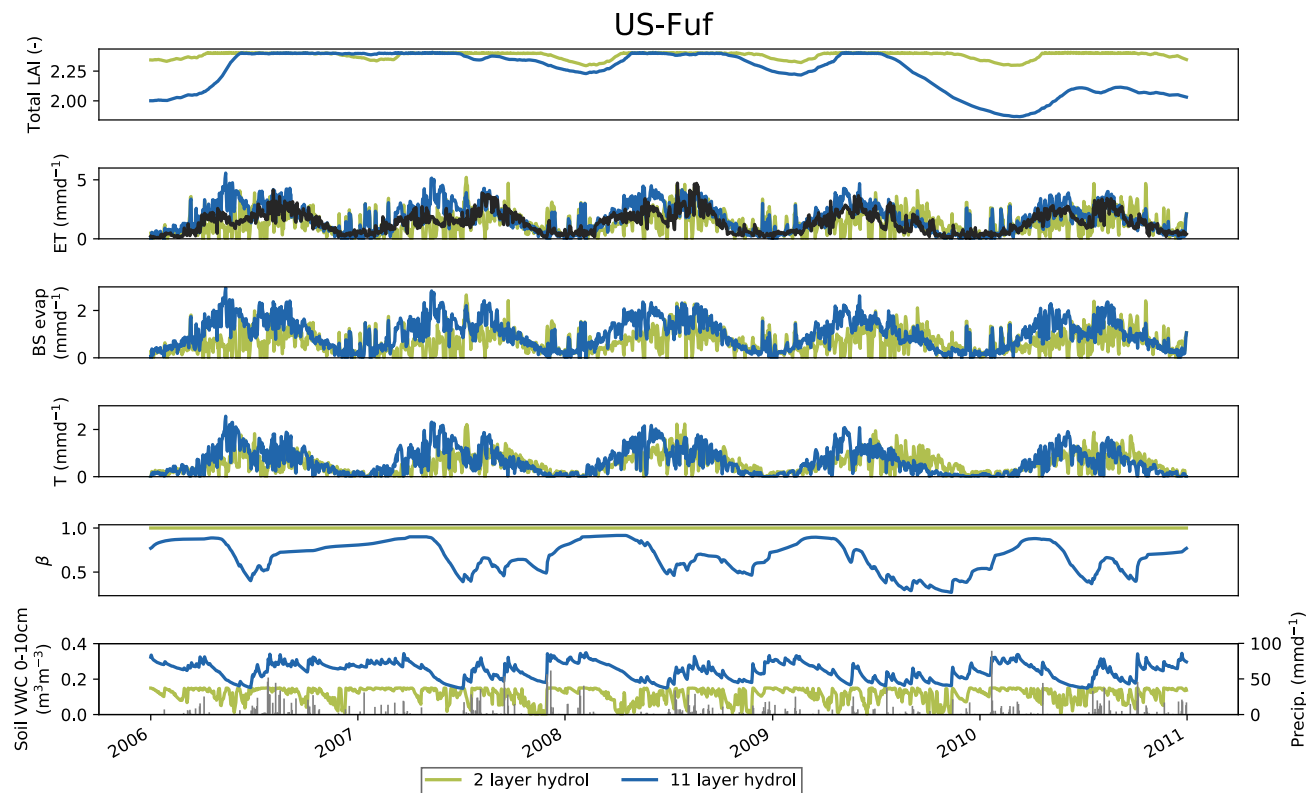



b) US-Vcp

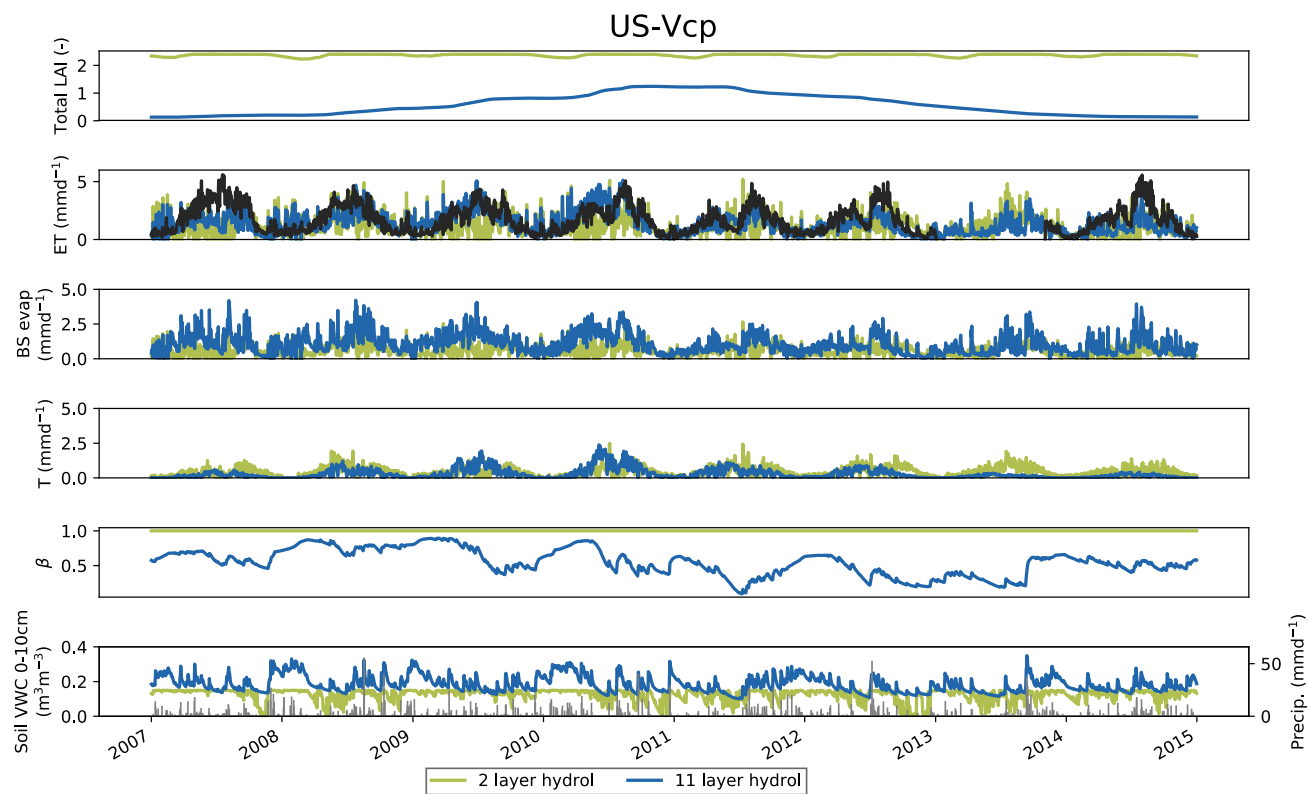

145

150

155

c) US-SRM

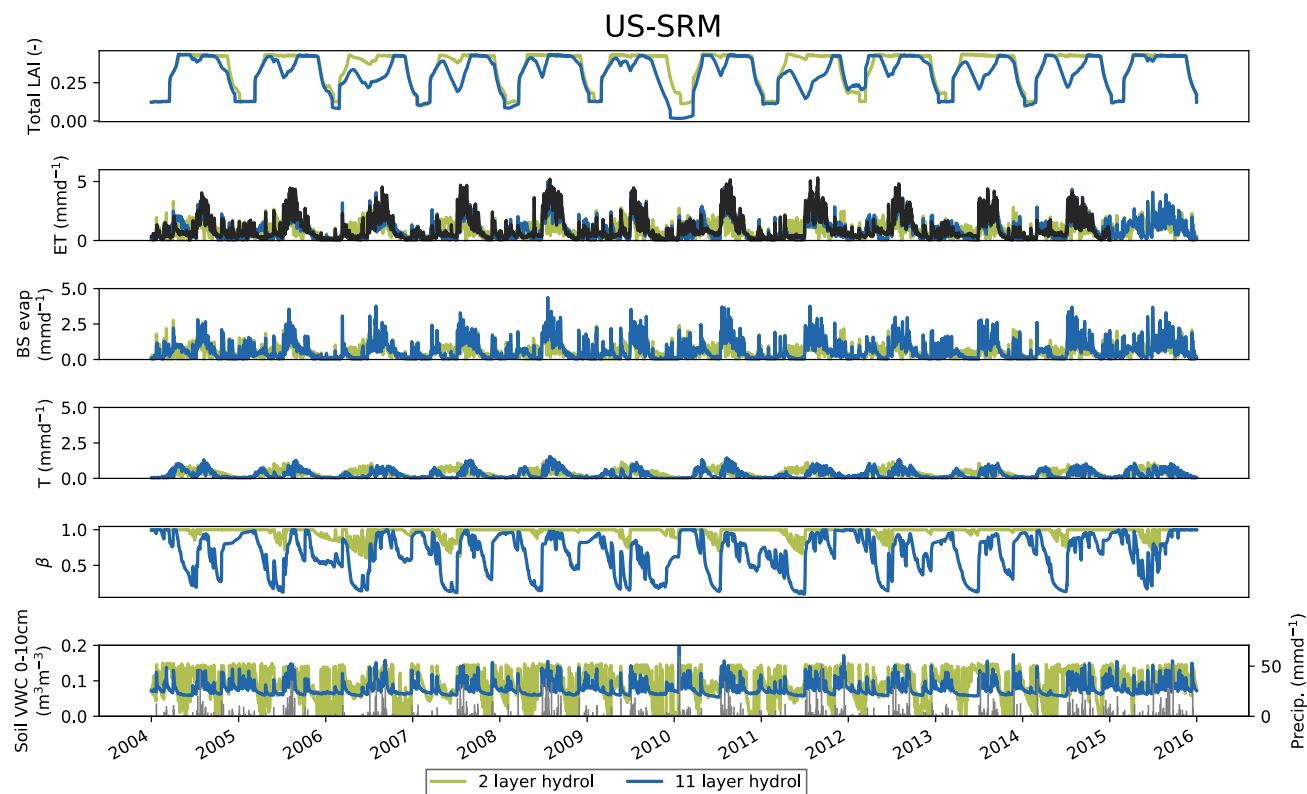

160

165

170

d) US-Whs

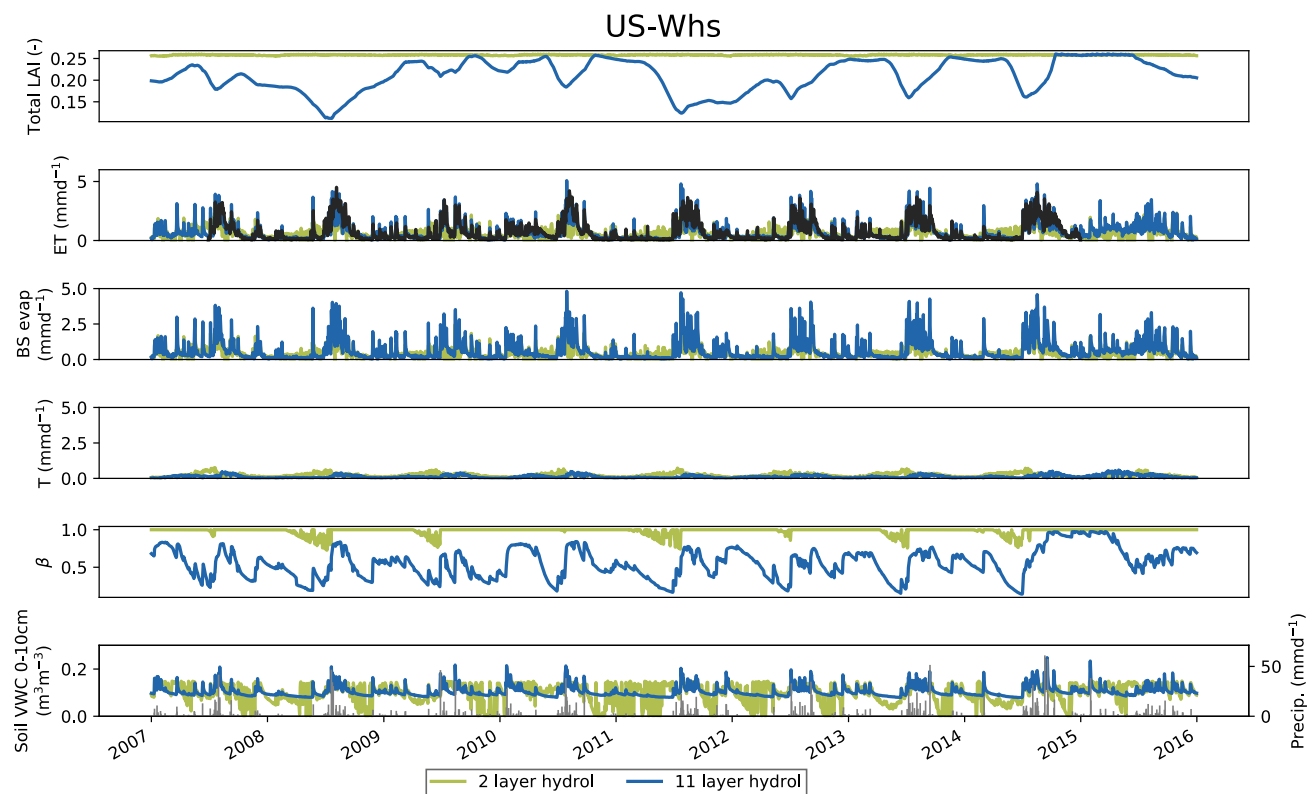

175

180

185

e) US-SRG

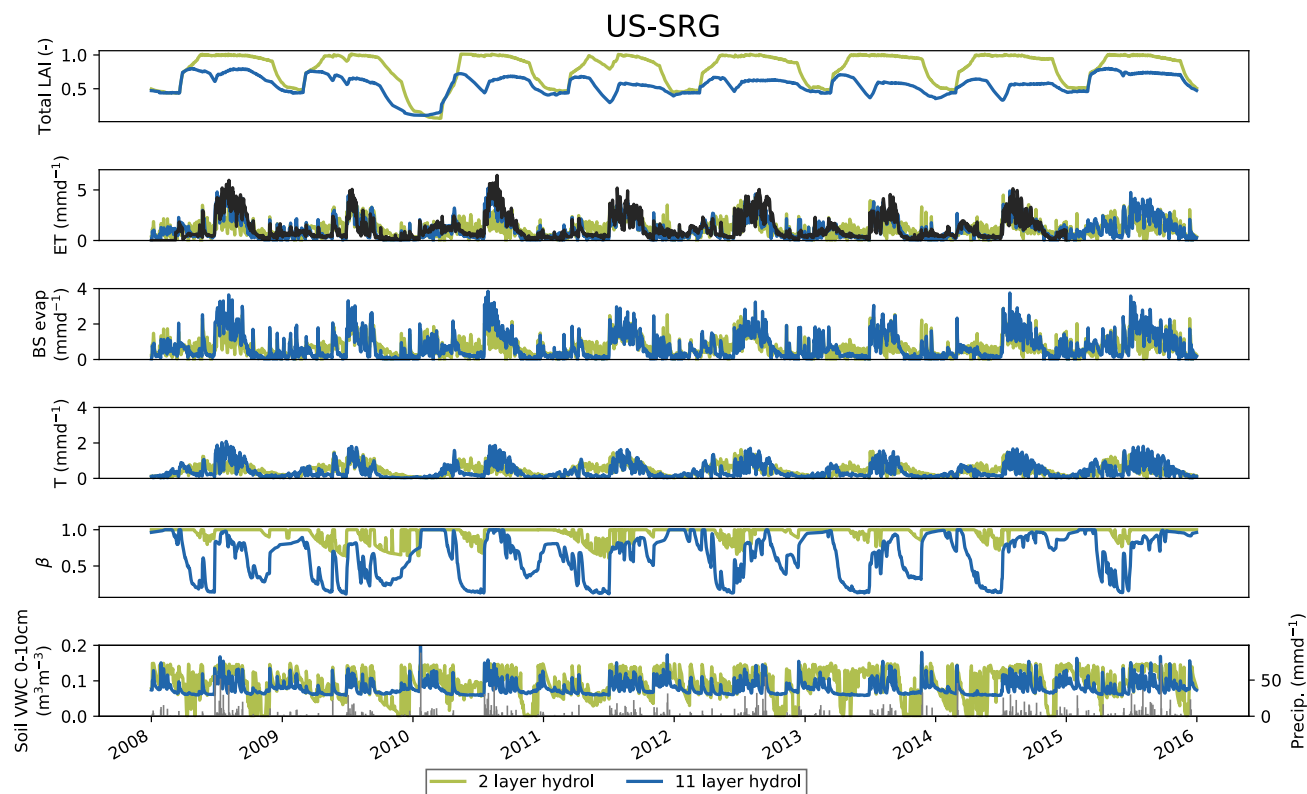

190

195

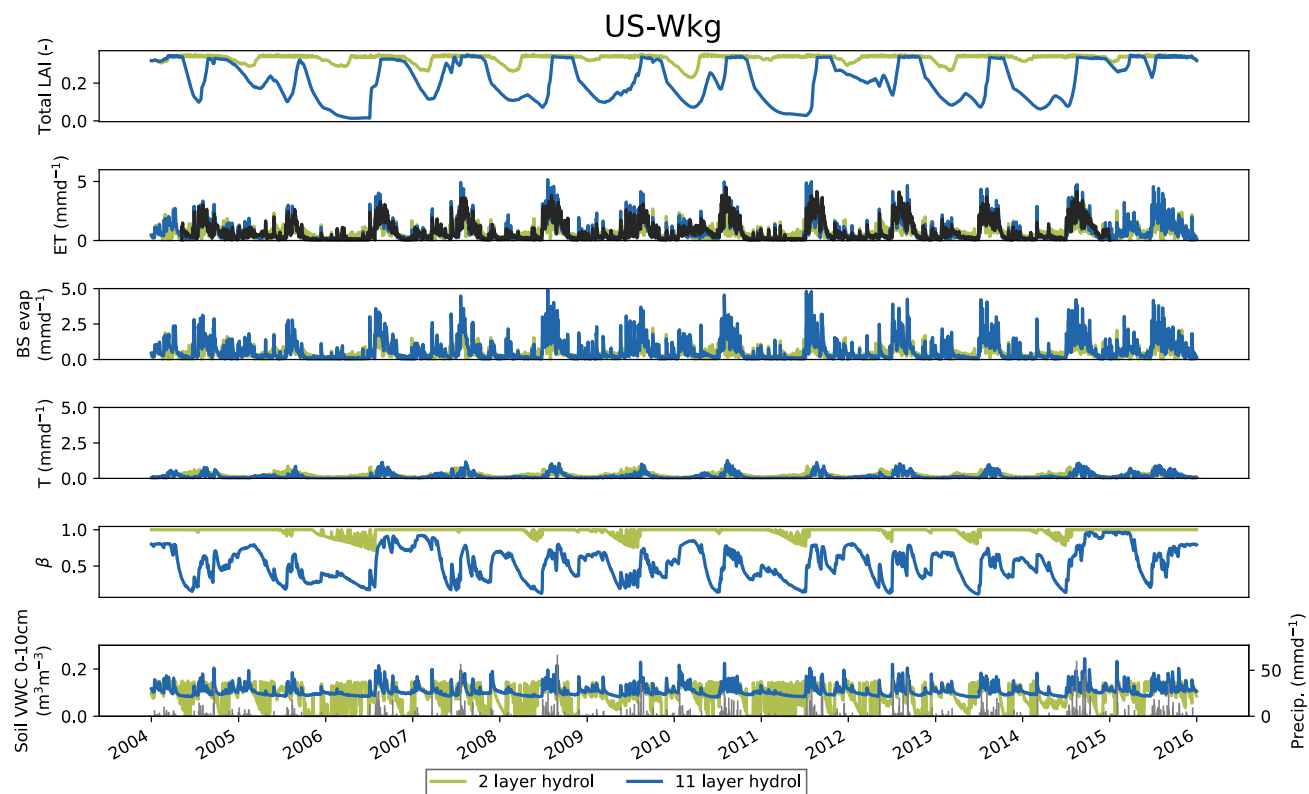

215

**Figure S3: Monthly mean seasonal cycle for each site comparing the 2LAY (green curve) and 11LAY simulations (blue curve) with observations (black curve). Top left: ET; top right: T/ET ratios; bottom left: transpiration; bottom right: bare soil evaporation. Units in mmd-1. Sites in following order: a) US-Fuf; b) US-Vcp; c) US-SRM; d) US-Whs; e) US-SRG; f) US-Wkg.**

**a) US-Fuf**

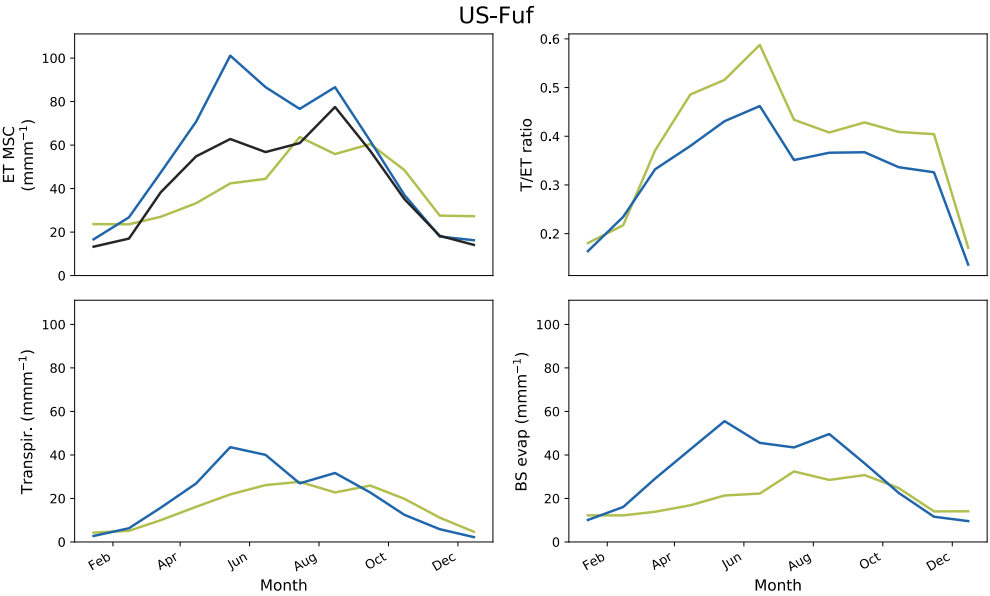

220

**b) US-Vcp**

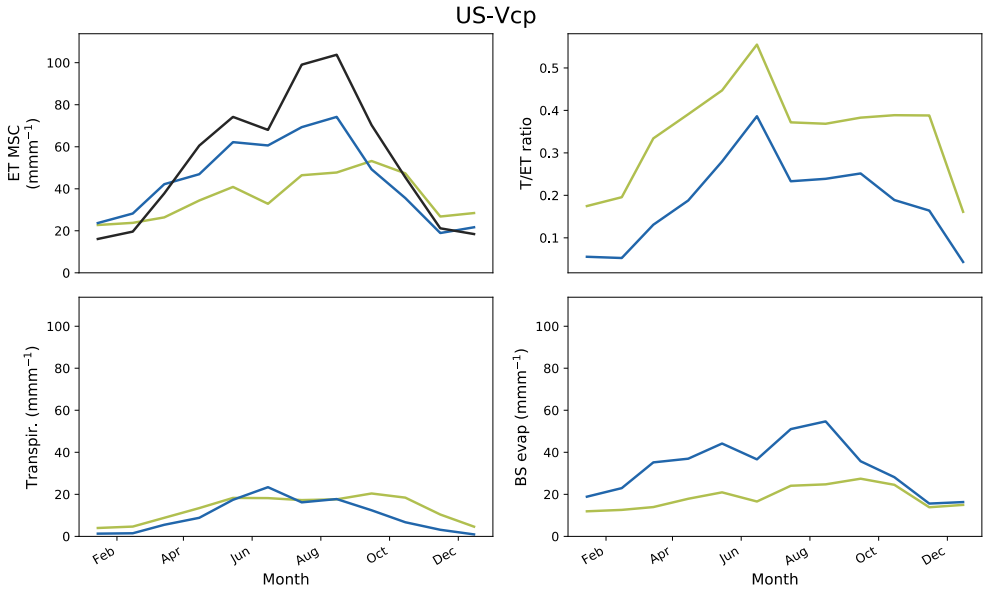

c) US-SRM

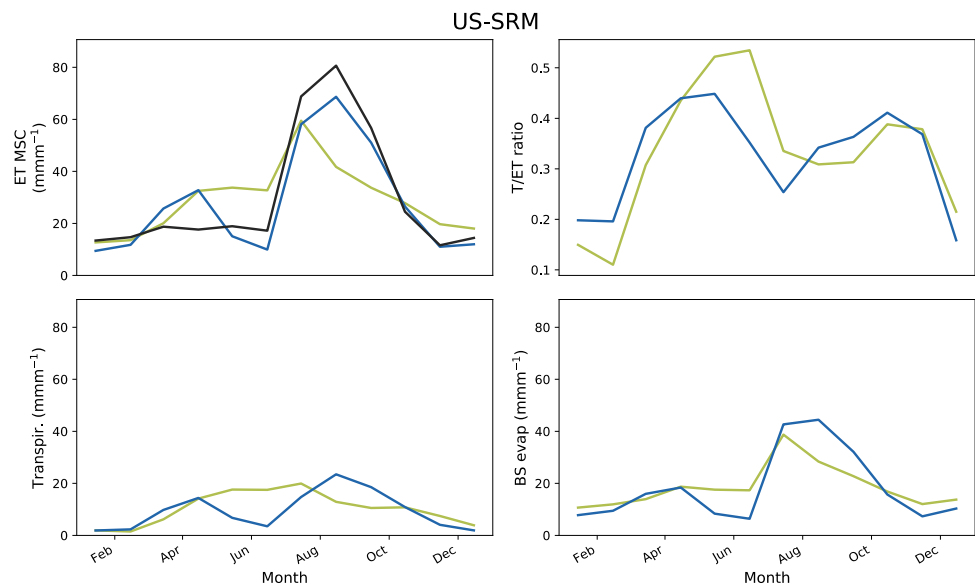

225

d) US-Whs

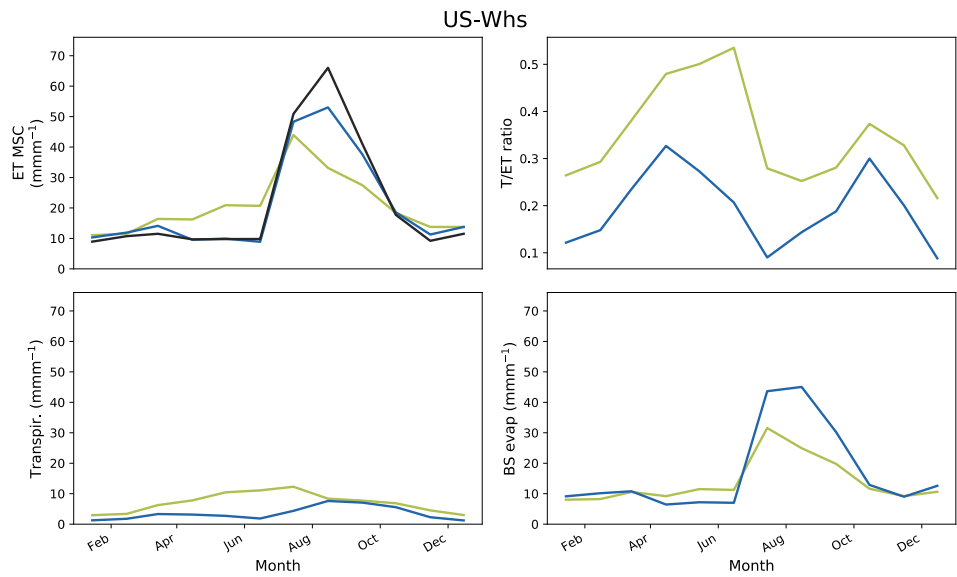

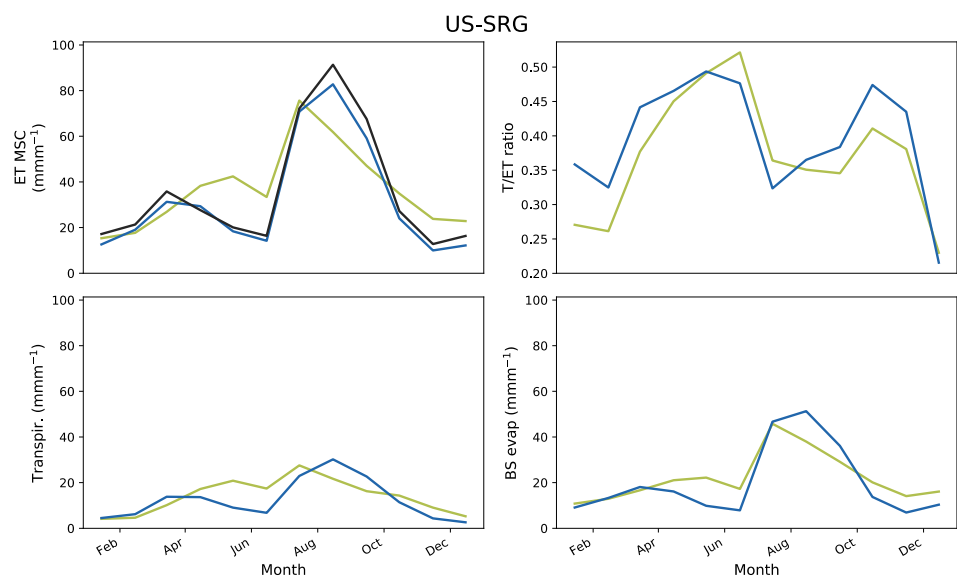

f) US-Wkg

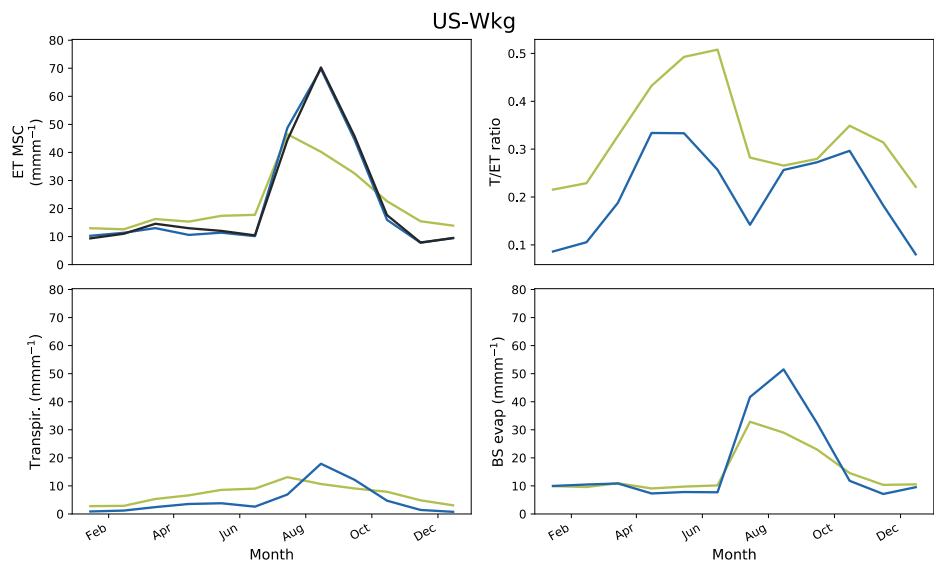



240

**Figure S4: Daily simulated volumetric soil water content (VWC –  $\text{m}^3\text{m}^{-3}$ ) across all site years compared to re-scaled (via linear CDF matching) observations at each site for three depths (upper, middle, lower) in the soil profile. The soil depths and their corresponding model layers are given in Table 2. Precipitation is shown in the grey lines in the bottom panel for each site.**

a) US-Fuf

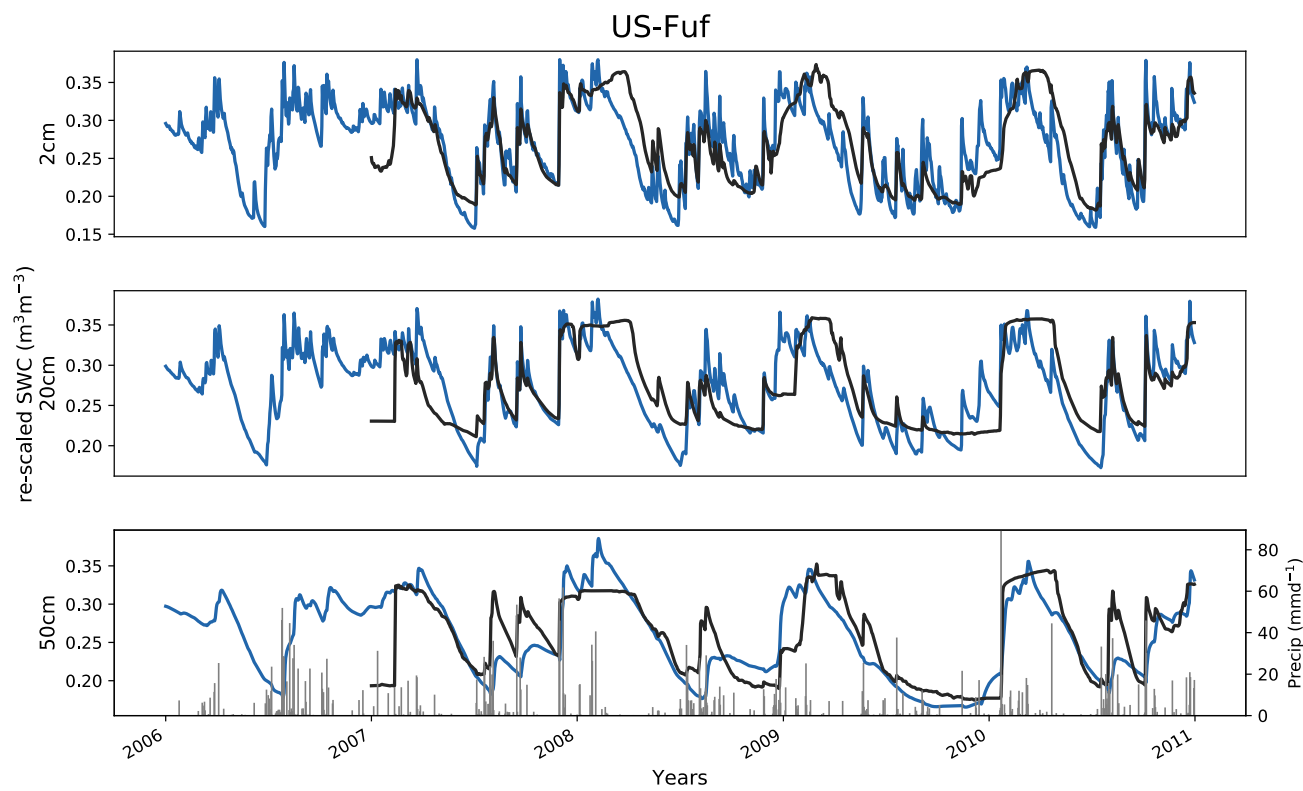

245

250

255

b) US-Vcp

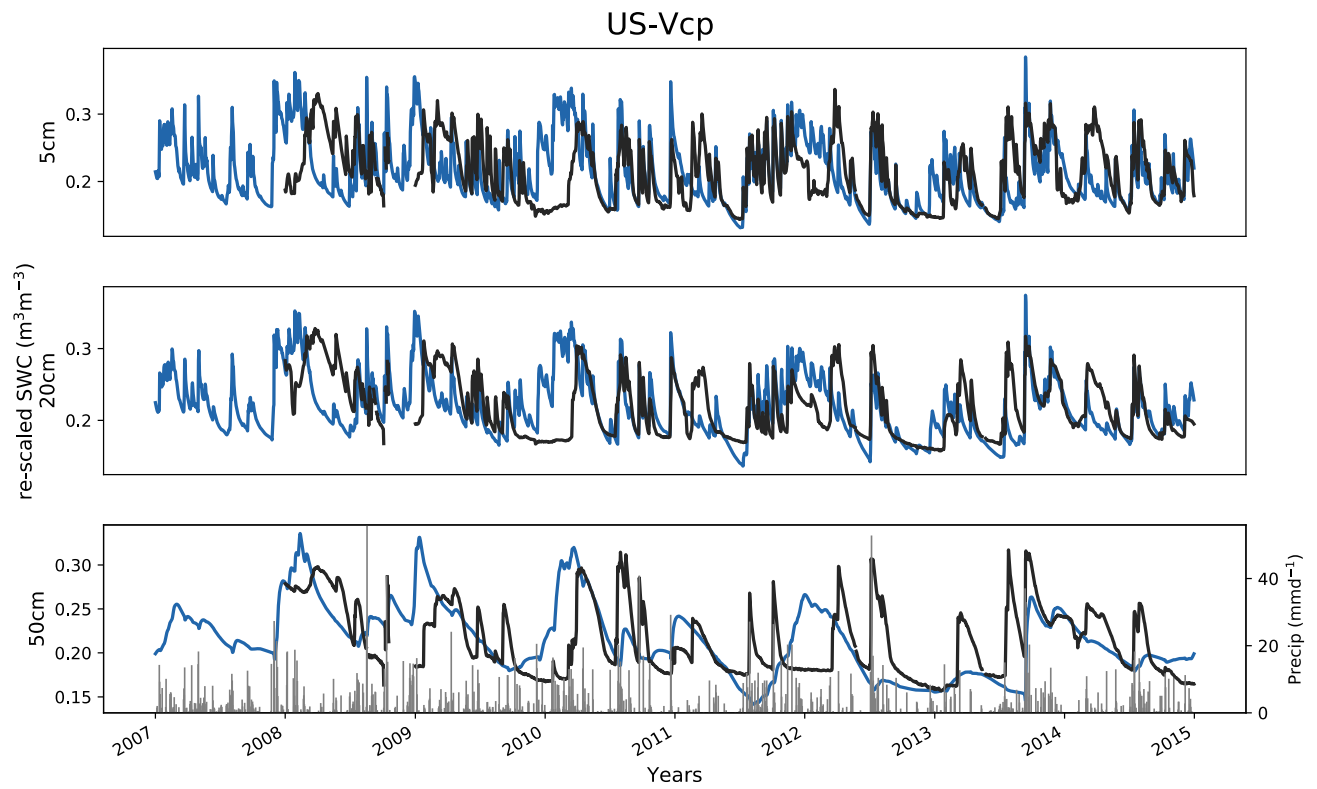

260

265

270

### c) US-SRM

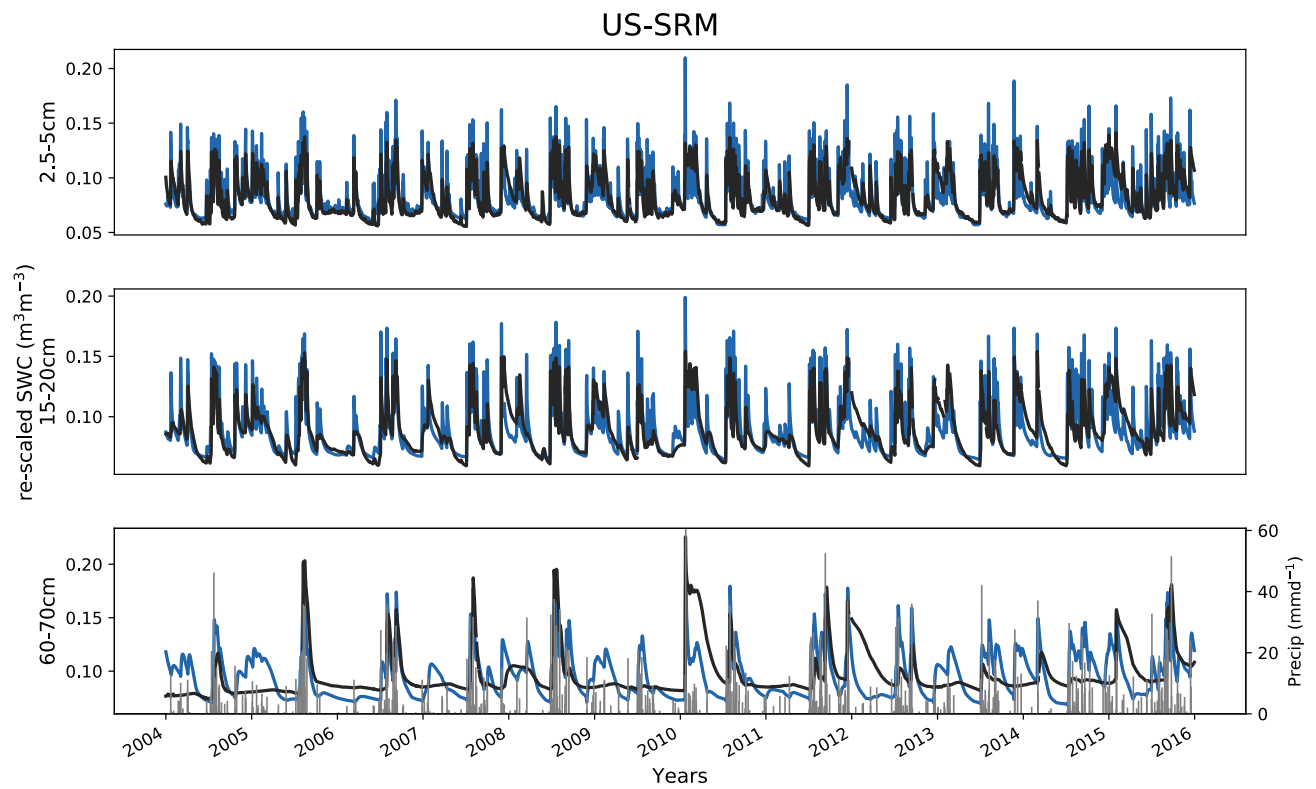

275

280

285

d) US-Whs

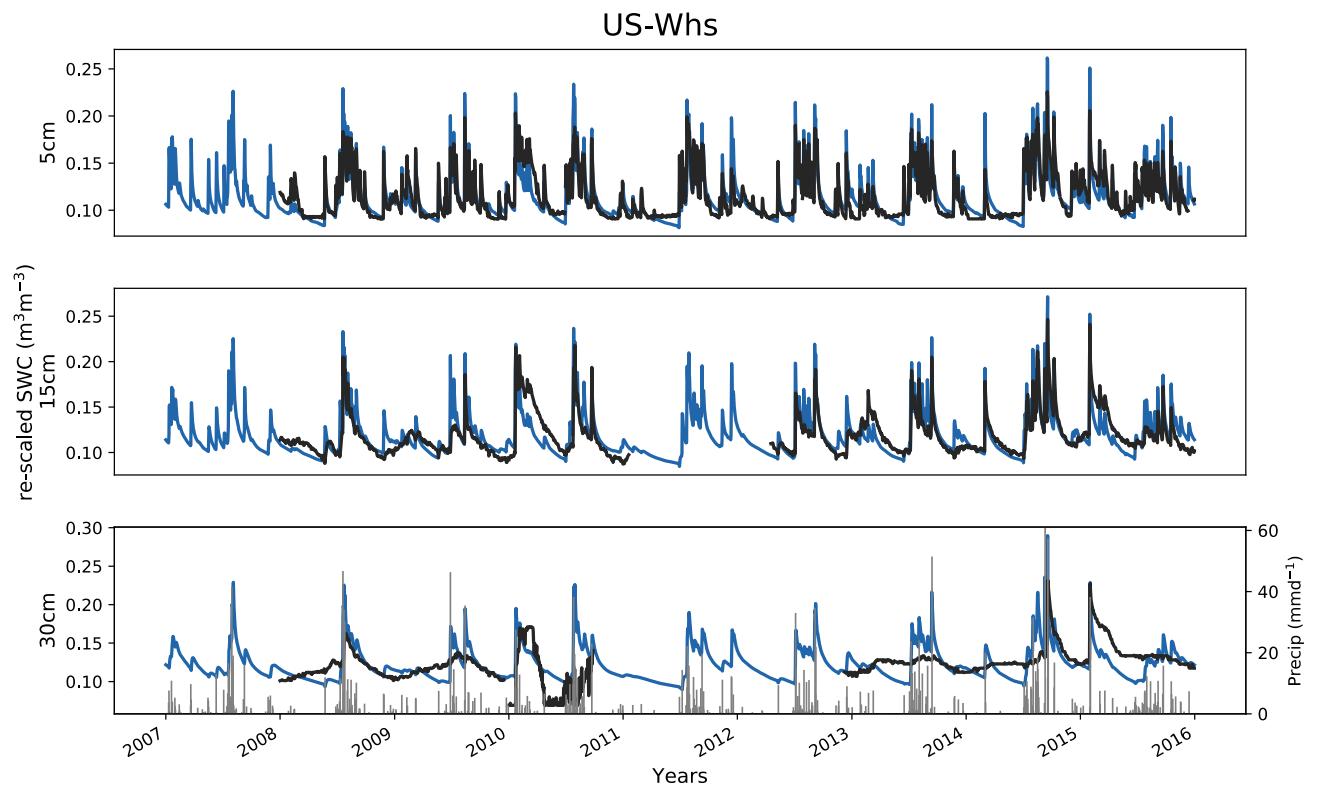

290

295

300

e) US-SRG

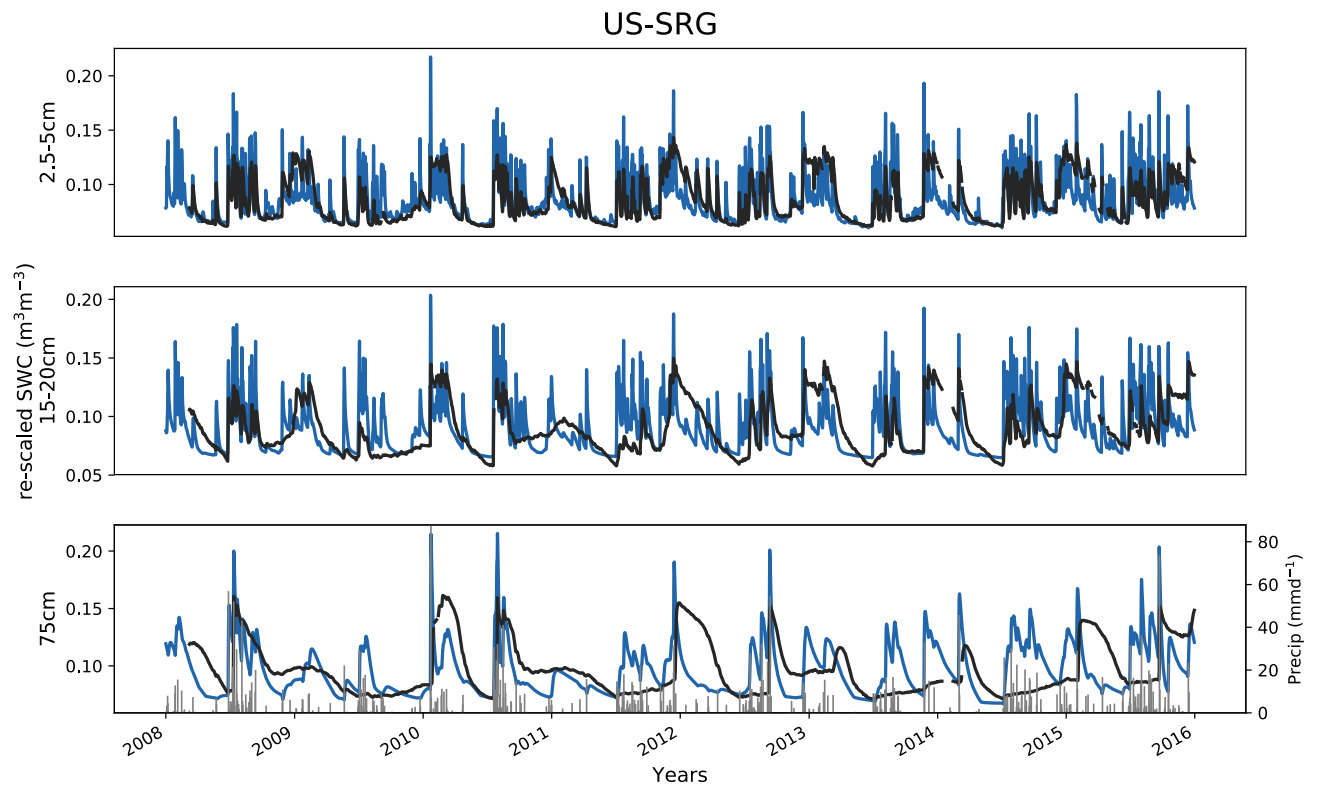

305

310

315

320      **f) US-Wkg**

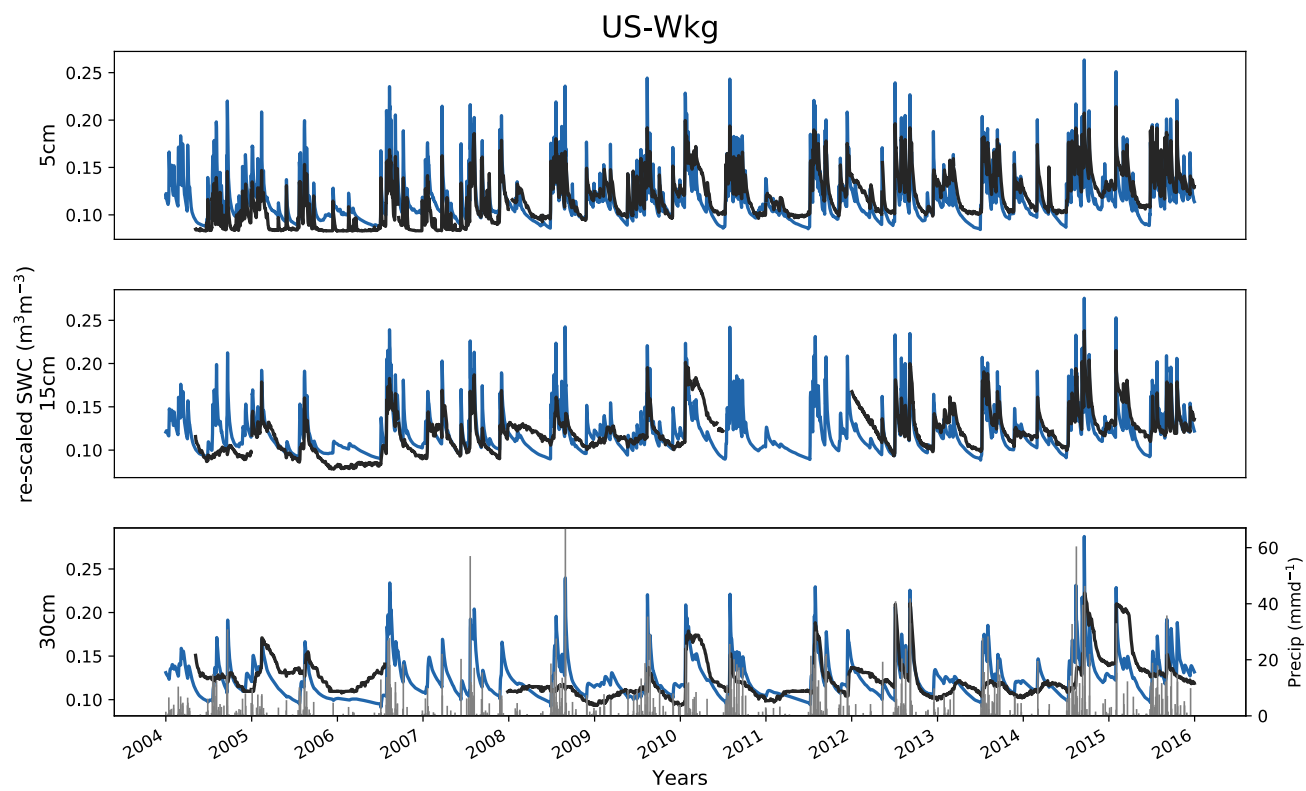

325

330

335

**Figure S5: Linear regressions between spring (March-April) mean monthly LAI and spring mean ET model-data misfits for each site. The dominant PFT is given in brackets for each site. See Table 1 for PFT acronyms.**

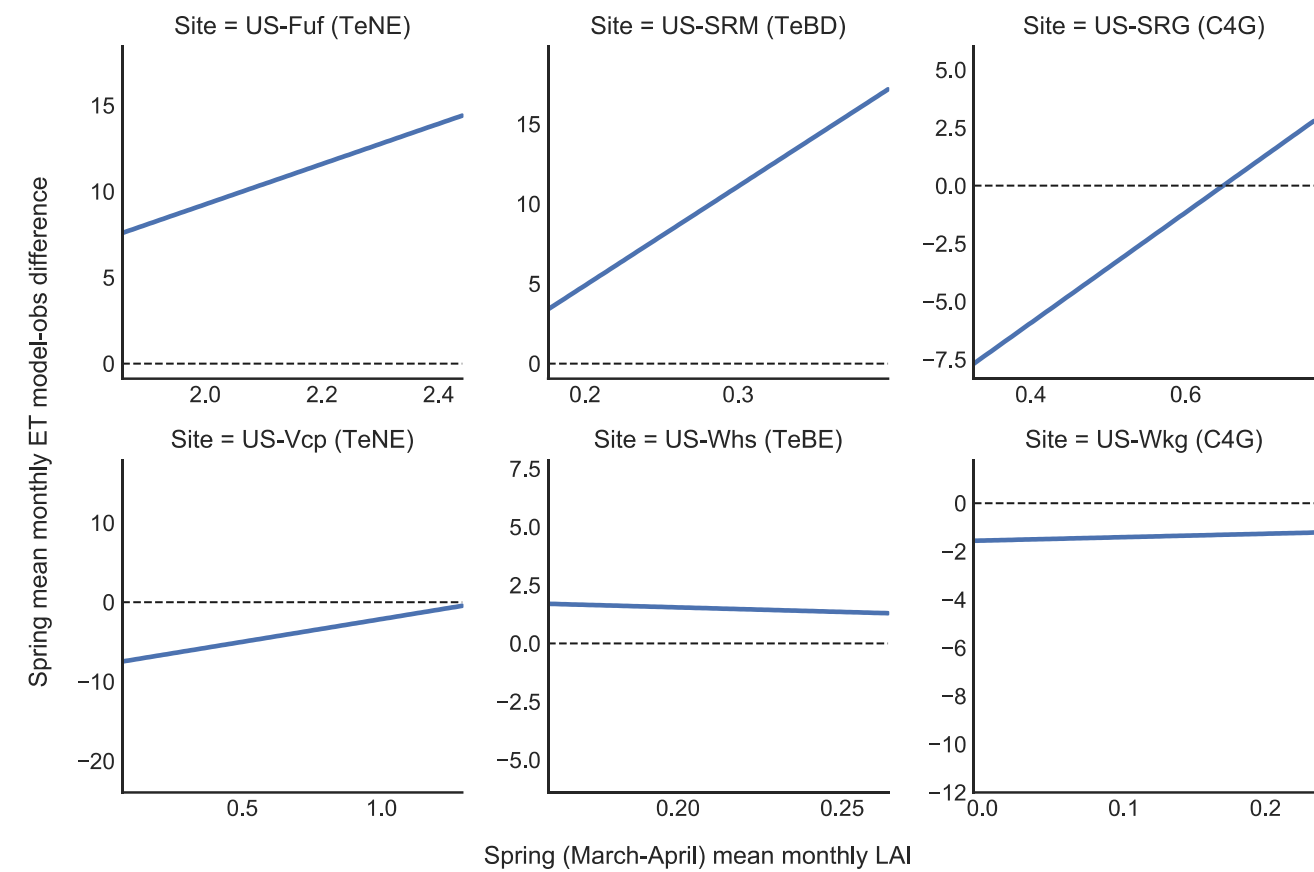

340

345

350

Figure S6: Plots comparing ET and LAI for C4 grasses (C4G) and mesquite shrubs (Temperate Broadleaved Deciduous – TeBD – PFT in ORCHIDEE) monthly mean seasonal cycles at US-SRM for the 2LAY (green curve) and 11LAY (blue curve) model versions in comparison to observations (black curve).

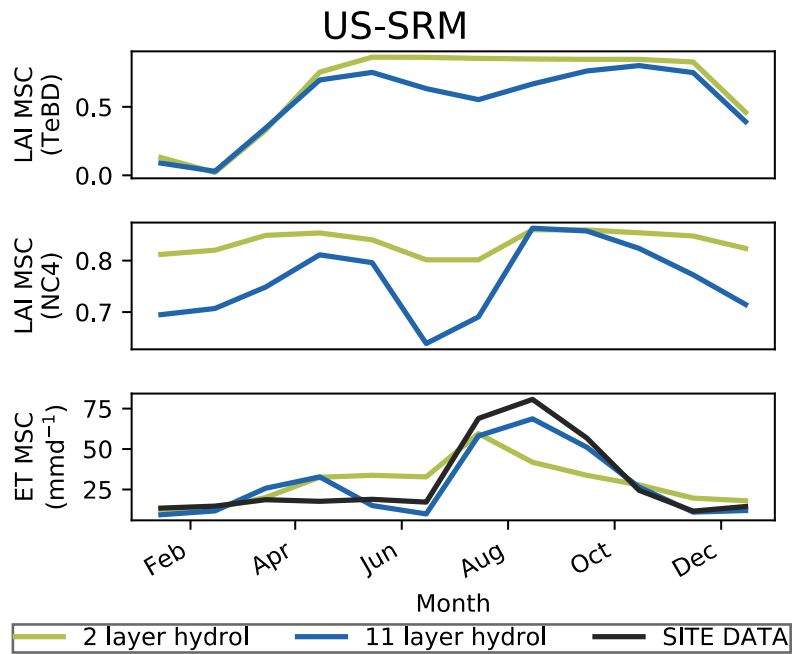

355

360

365

370



**Figure S7: Linear regressions between monsoon (July-September) mean monthly LAI and monsoon mean ET model-data misfits for each site. The dominant PFT is given in brackets for each site. See Table 1 for PFT acronyms.**

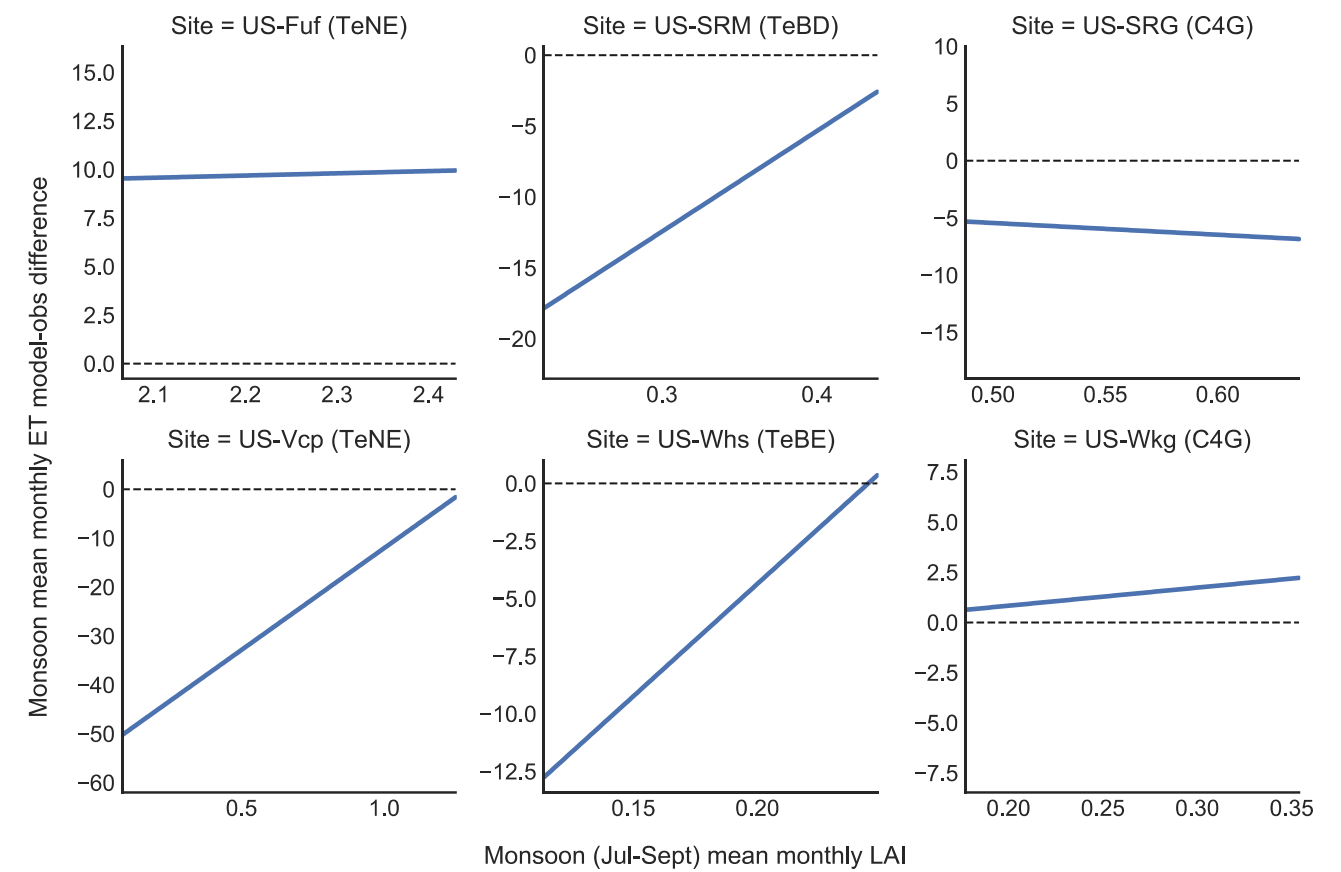

375

380

385

Figure S8: ET monthly mean seasonal cycle for all low elevation sites comparing the default 11LAY simulations (blue curve) with a simulation that increased the C4 grass fraction at the expense of the bare soil fraction (yellow curve). ET is compared to observations (black curve). Units in mmmmonth-1.

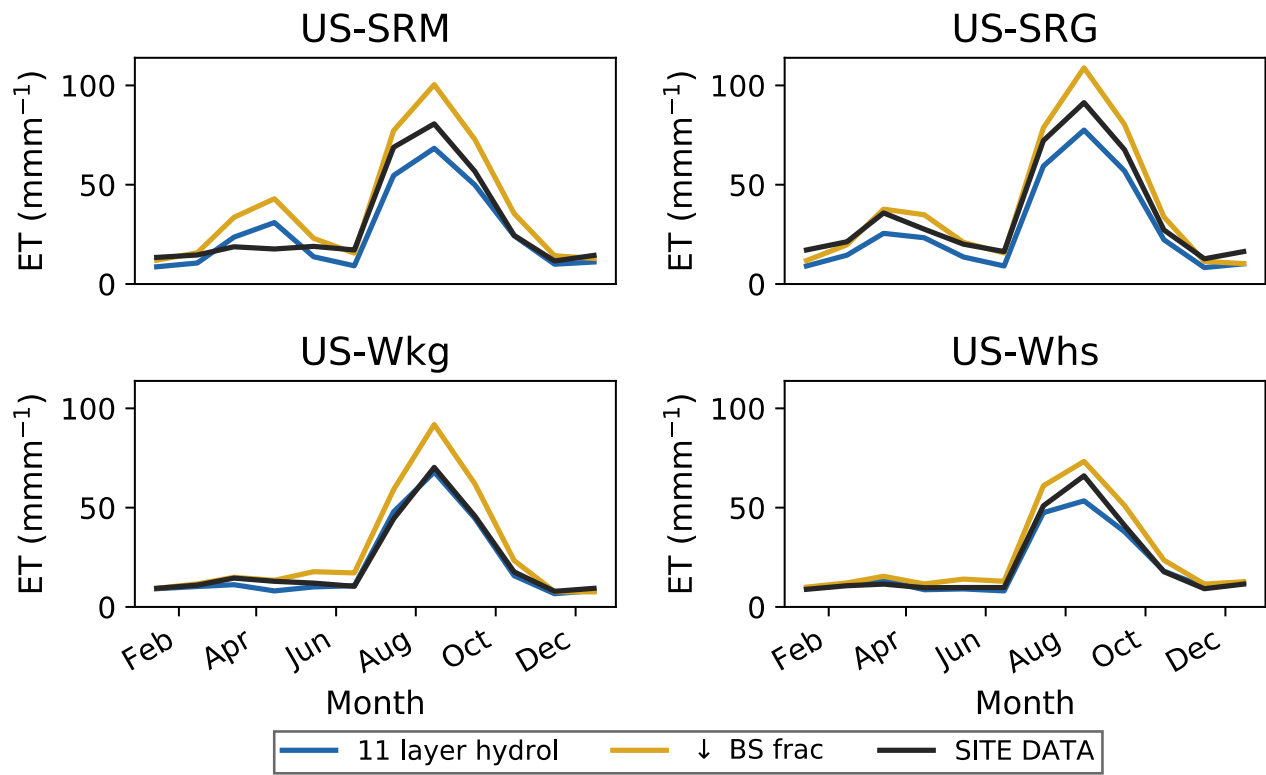

390

395

400

Figure S9: Monthly mean seasonal cycle for all sites comparing the default 11LAY simulations (blue curve) with a simulation that included an additional bare soil evaporation resistance term (red curve). ET is compared to observations (black curve). In all subfigures – top right: T/ET ratios; bottom left: transpiration; bottom right: bare soil evaporation. Units in mmmmonth-1.

405 a) US-Fuf

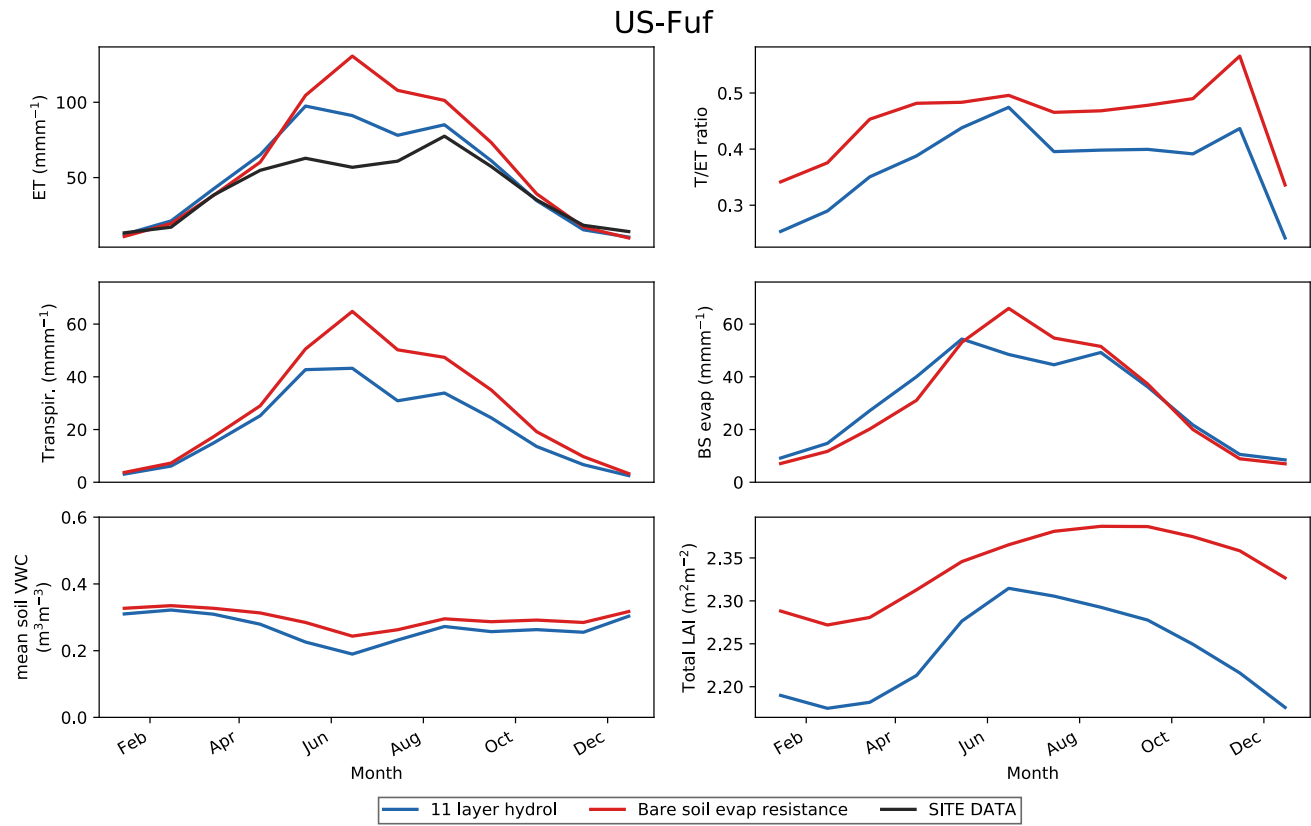

410

415

b) US-Vcp

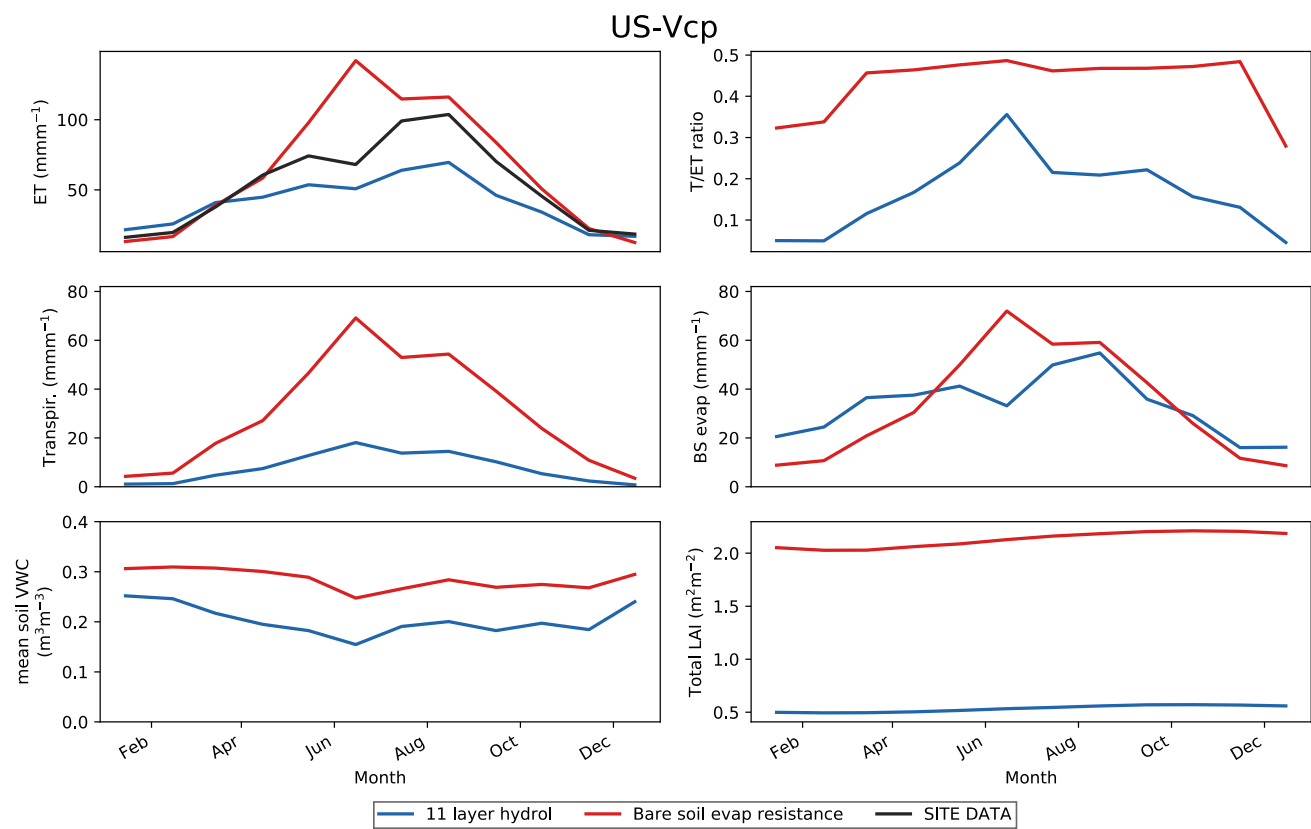

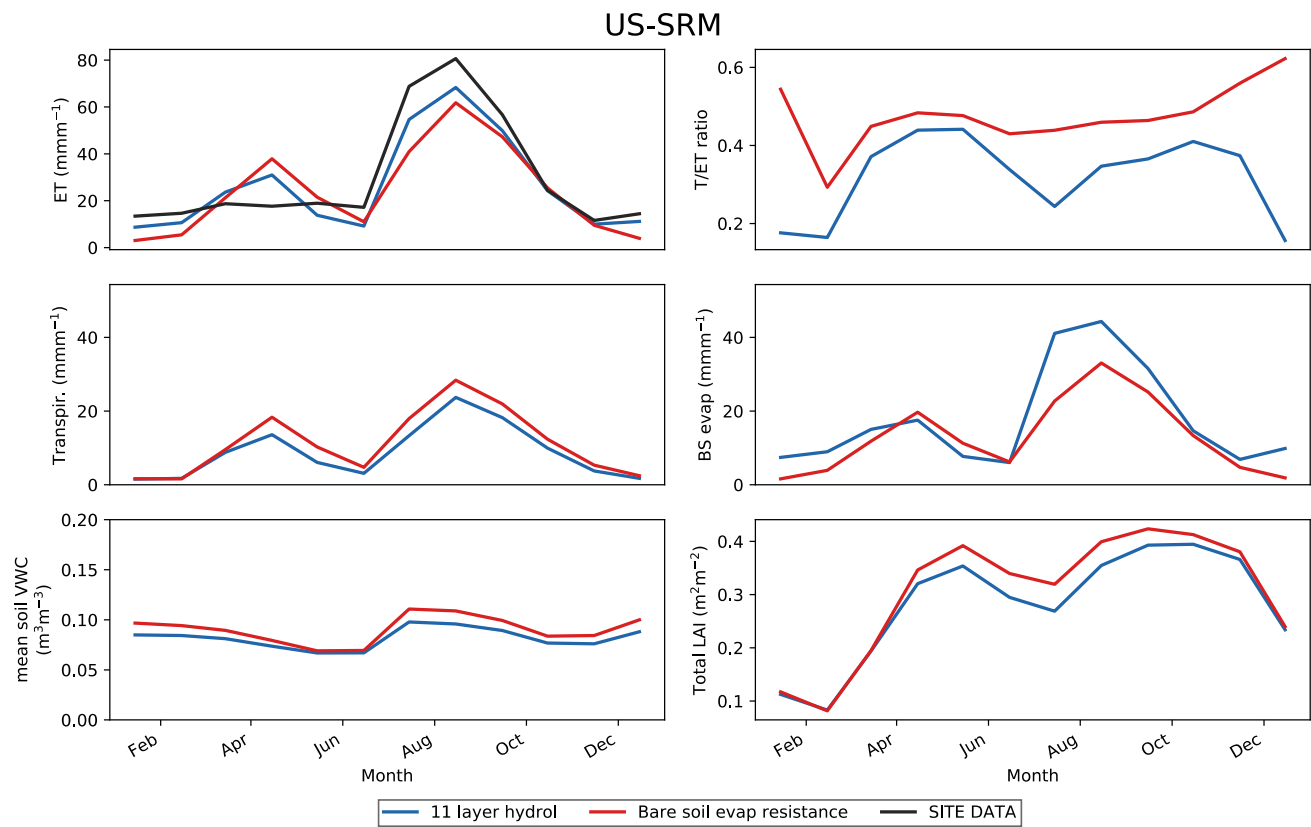

d) US-Whs

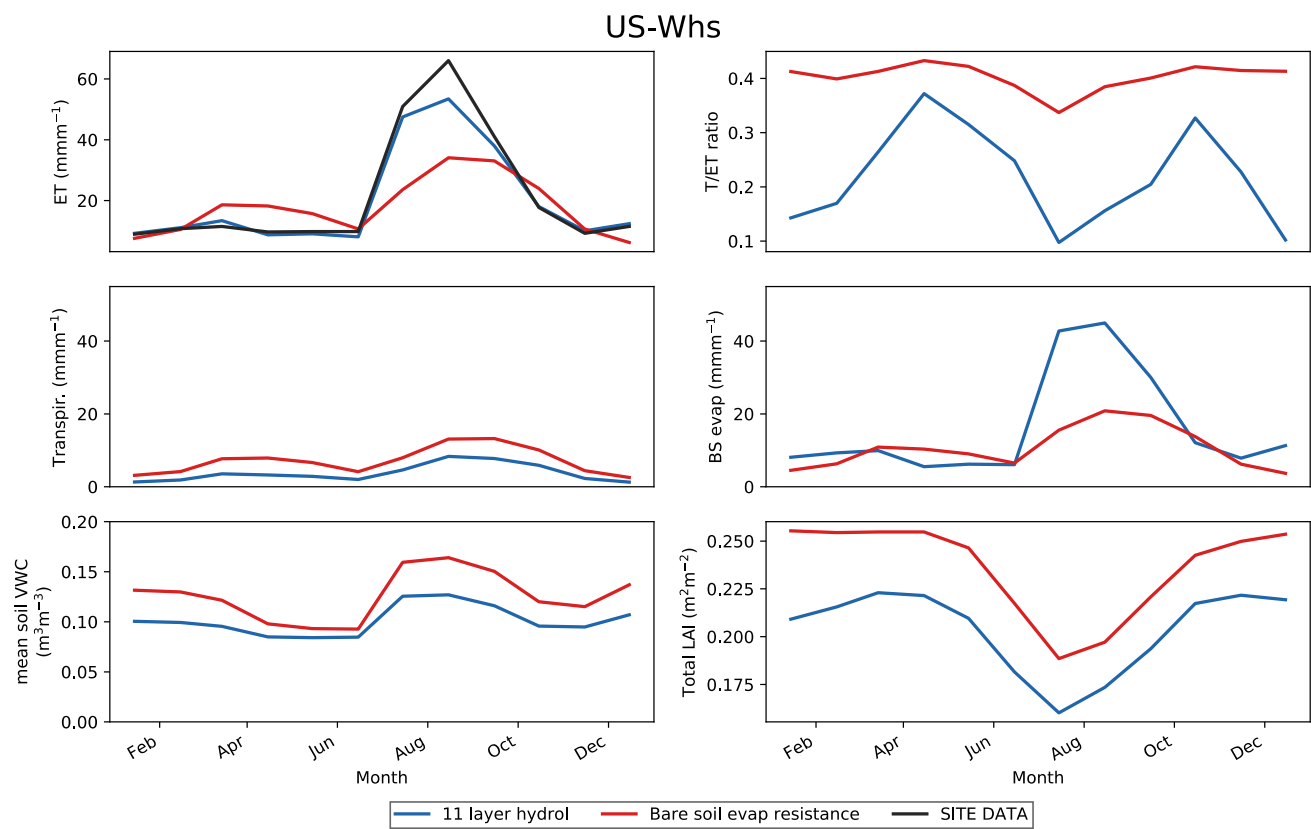

455

460

465

e) US-SRG

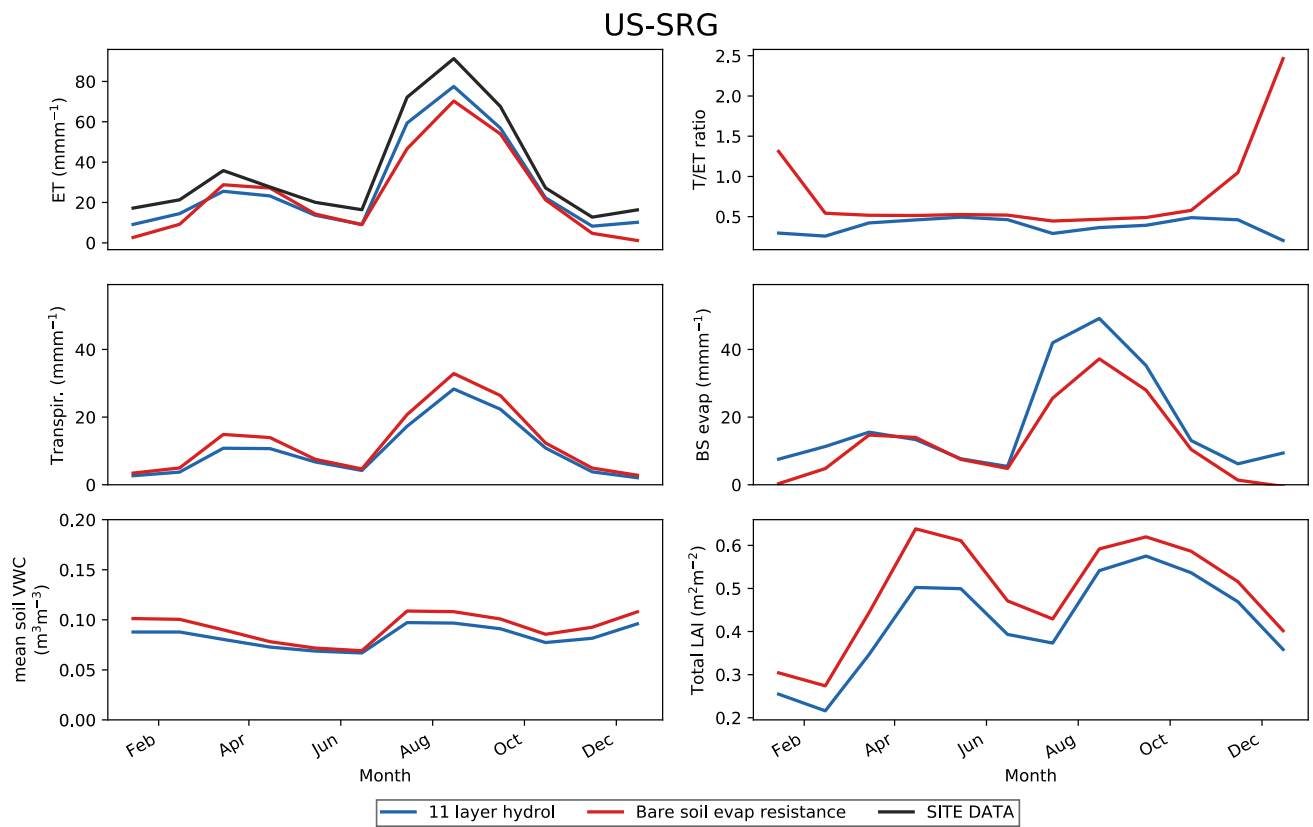

470

475

480

f) US-Wkg

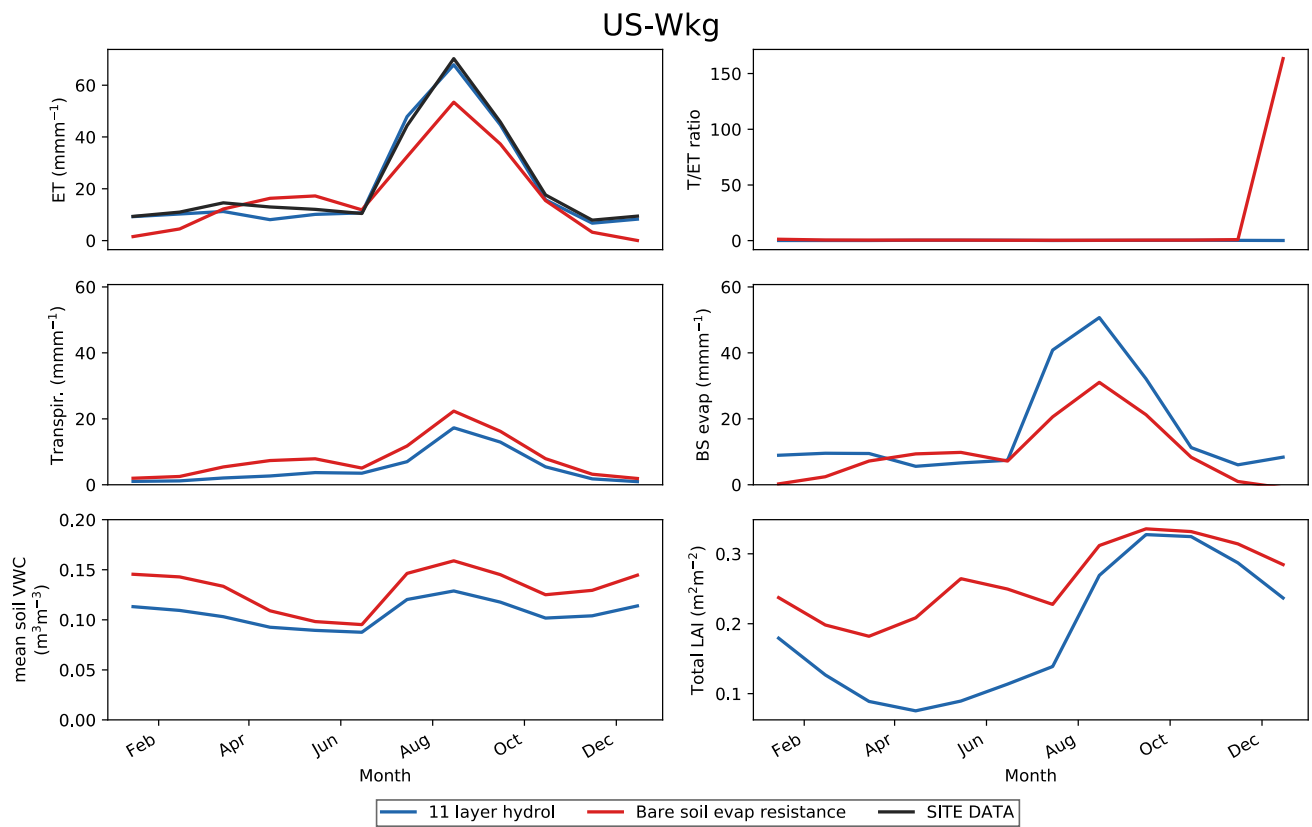

485

490

495



Figure S10: Monthly mean seasonal cycle for all sites comparing the default 11LAY simulations (blue curve) with a) with a simulation that increased the C4 grass fraction at the expense of the bare soil fraction (yellow curve); and b) a simulation that included an additional bare soil evaporation resistance term (red curve). In all subfigures – top left: mean soil moisture; top right: ET compared to observation (black curve); bottom left: transpiration; bottom right: bare soil evaporation. Units in mmmmonth-1.

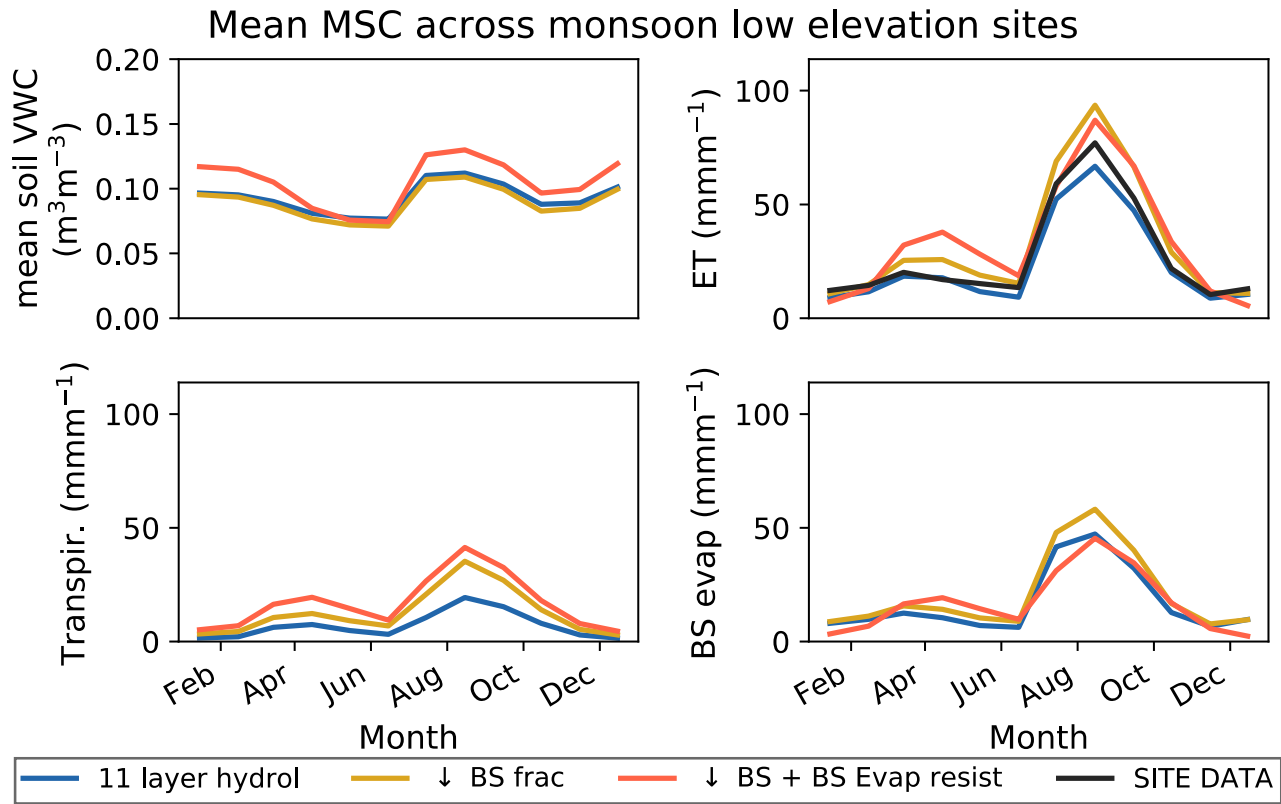

Supplement: Supplementary file 1 [file hess-2019-598-supplement.pdf]
